# Supplementary material for: PrEP distribution in pharmacies: a systematic review
Source: PubMed Central journal article supplement — BMJ Open. 2022 Feb 18;12(2):e054121. doi: 10.1136/bmjopen-2021-054121 (PMC8860049; doi:10.1136/bmjopen-2021-054121), 2022-02-18
Supplement: bmjopen-2021-054121.draft_revisions.pdf [file bmjopen-2021-054121.draft_revisions.pdf]

# BMJ Open

BMJ Open is committed to open peer review. As part of this commitment we make the peer review history of every article we publish publicly available.

When an article is published we post the peer reviewers' comments and the authors' responses online. We also post the versions of the paper that were used during peer review. These are the versions that the peer review comments apply to.

The versions of the paper that follow are the versions that were submitted during the peer review process. They are not the versions of record or the final published versions. They should not be cited or distributed as the published version of this manuscript.

BMJ Open is an open access journal and the full, final, typeset and author-corrected version of record of the manuscript is available on our site with no access controls, subscription charges or pay-per-view fees (<http://bmjopen.bmj.com>).

If you have any questions on BMJ Open's open peer review process please email [info.bmjopen@bmj.com](mailto:info.bmjopen@bmj.com)

# BMJ Open

## PrEP distribution in pharmacies: a systematic review

|                               |                                                                                                                                                                                                                                                                                                                                                                                                                                                                                                                                                                                                                                                                     |
|-------------------------------|---------------------------------------------------------------------------------------------------------------------------------------------------------------------------------------------------------------------------------------------------------------------------------------------------------------------------------------------------------------------------------------------------------------------------------------------------------------------------------------------------------------------------------------------------------------------------------------------------------------------------------------------------------------------|
| Journal:                      | <i>BMJ Open</i>                                                                                                                                                                                                                                                                                                                                                                                                                                                                                                                                                                                                                                                     |
| Manuscript ID                 | bmjopen-2021-054121                                                                                                                                                                                                                                                                                                                                                                                                                                                                                                                                                                                                                                                 |
| Article Type:                 | Original research                                                                                                                                                                                                                                                                                                                                                                                                                                                                                                                                                                                                                                                   |
| Date Submitted by the Author: | 03-Jun-2021                                                                                                                                                                                                                                                                                                                                                                                                                                                                                                                                                                                                                                                         |
| Complete List of Authors:     | Kennedy, Caitlin; Johns Hopkins University Bloomberg School of Public Health, International Health<br>Yeh, Ping; Johns Hopkins University Bloomberg School of Public Health, Department of International Health<br>Atkins, Kaitlyn; Johns Hopkins University Bloomberg School of Public Health, Department of International Health<br>Ferguson, Laura; University of Southern California, Keck School of Medicine, Institute on Inequalities in Global Health<br>Baggaley, R; World Health Organization, Department of HIV, Viral Hepatitis, and STIs<br>Narasimhan, Manjulaa; World Health Organization, Department of Sexual and Reproductive Health and Research |
| Keywords:                     | Public health < INFECTIOUS DISEASES, HIV & AIDS < INFECTIOUS DISEASES, PREVENTIVE MEDICINE, Organisation of health services < HEALTH SERVICES ADMINISTRATION & MANAGEMENT                                                                                                                                                                                                                                                                                                                                                                                                                                                                                           |
|                               |                                                                                                                                                                                                                                                                                                                                                                                                                                                                                                                                                                                                                                                                     |

SCHOLARONE™  
Manuscripts

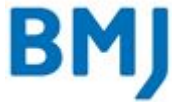

I, the Submitting Author has the right to grant and does grant on behalf of all authors of the Work (as defined in the below author licence), an exclusive licence and/or a non-exclusive licence for contributions from authors who are: i) UK Crown employees; ii) where BMJ has agreed a CC-BY licence shall apply, and/or iii) in accordance with the terms applicable for US Federal Government officers or employees acting as part of their official duties; on a worldwide, perpetual, irrevocable, royalty-free basis to BMJ Publishing Group Ltd ("BMJ") its licensees and where the relevant Journal is co-owned by BMJ to the co-owners of the Journal, to publish the Work in this journal and any other BMJ products and to exploit all rights, as set out in our [licence](#).

The Submitting Author accepts and understands that any supply made under these terms is made by BMJ to the Submitting Author unless you are acting as an employee on behalf of your employer or a postgraduate student of an affiliated institution which is paying any applicable article publishing charge ("APC") for Open Access articles. Where the Submitting Author wishes to make the Work available on an Open Access basis (and intends to pay the relevant APC), the terms of reuse of such Open Access shall be governed by a Creative Commons licence – details of these licences and which [Creative Commons](#) licence will apply to this Work are set out in our licence referred to above.

Other than as permitted in any relevant BMJ Author's Self Archiving Policies, I confirm this Work has not been accepted for publication elsewhere, is not being considered for publication elsewhere and does not duplicate material already published. I confirm all authors consent to publication of this Work and authorise the granting of this licence.

## PrEP distribution in pharmacies: a systematic review

Caitlin E. Kennedy<sup>1</sup>, Ping Teresa Yeh<sup>1</sup>, Kaitlyn Atkins<sup>1</sup>, Laura Ferguson<sup>2</sup>, Rachel Baggaley<sup>3</sup>, Manjulaa Narasimhan<sup>4</sup>

<sup>1</sup> Department of International Health, Johns Hopkins Bloomberg School of Public Health, Baltimore, Maryland, USA. Caitlin E. Kennedy, Associate Professor. Ping Teresa Yeh, Research Associate. Kaitlyn Atkins, PhD Candidate.

<sup>2</sup> Institute on Inequalities in Global Health, Keck School of Medicine, University of Southern California, Los Angeles, California, USA. Laura Ferguson, Assistant Professor.

<sup>3</sup> Department of Global HIV, Hepatitis and STI Programmes, World Health Organization, Geneva, Switzerland. Rachel Baggaley, Coordinator of HIV testing, prevention and populations.

<sup>4</sup> Department of Sexual and Reproductive Health and Research, World Health Organization, includes the UNDP/UNFPA/UNICEF/WHO/World Bank Special Programme of Research, Development and Research Training in Human Reproduction – HRP, Geneva, Switzerland. Manjulaa Narasimhan, Scientist.

### Correspondence to:

Manjulaa Narasimhan

Department of Sexual and Reproductive Health and Research

UNDP/UNFPA/UNICEF/WHO/World Bank Special Programme

World Health Organization

20 Avenue Appia, 1211 Geneva 27, Switzerland

Email: [narasimhanm@who.int](mailto:narasimhanm@who.int)

**Word count:** 4207

## **Abstract**

**Introduction:** Novel mechanisms of service delivery are needed to expand access to pre-exposure prophylaxis (PrEP) for HIV prevention to individuals at high risk. Providing PrEP directly through pharmacies could offer an additional option for reaching potential users with this safe and effective HIV prevention tool.

**Methods:** We conducted a systematic review of studies examining effectiveness, values and preferences of end users and providers, and cost of PrEP initiation and continuation through pharmacies (pharmacy access). Standardized methods were used to search, screen, and extract data from included studies.

**Results:** No articles met the inclusion criteria for the effectiveness review, for either PrEP initiation or continuation. However, seven “case studies” presenting non-comparative data from PrEP pharmacy programs demonstrated feasibility of this model in the United States. Eleven studies reported values and preferences of end users and providers. In the United States, Kenya, and South Africa, potential PrEP clients generally supported pharmacy access, though some preferred clinics. One study of actual PrEP pharmacy clients found all would “definitely recommend” the program. Six studies found pharmacists were generally supportive of offering PrEP; one study including doctors found more limited favor, while one study of diverse Kenyan stakeholders found broad support. Three studies reported cost data indicating client willingness to pay in the United States and Kenya and initial sustainability of a clinic financial model in the United States.

**Conclusion:** Provision of PrEP through pharmacies has been demonstrated to be feasible in the United States and acceptable to potential end users and stakeholders in multiple settings. Limited evidence on effectiveness and requirements for laboratory testing and assurance of high-quality services may limit enthusiasm for this approach. Further research is needed to determine if pharmacy access is a safe and effective way to help achieve global HIV prevention goals.

**Keywords:** PrEP, pharmacy, systematic review, values and preferences

**Systematic review registration number:** PROSPERO CRD42021231650

### **Strengths and limitations of this study**

- Novel service delivery mechanisms are needed to expand PrEP for HIV prevention to high-risk individuals, including providing PrEP through pharmacies.
- Seven case studies of PrEP pharmacy programs demonstrated feasibility in the US.
- In the US, Kenya, and South Africa, potential PrEP clients generally supported pharmacy access and actual PrEP pharmacy clients all would "definitely recommend" the program; pharmacists, doctors, and other stakeholders generally supported offering PrEP through pharmacies.
- Clients in the US and Kenya were willing to pay for PrEP through pharmacies, and initial sustainability of a clinic financial model for pharmacy access was demonstrated in the US.
- Pharmacy access to PrEP has been demonstrated to be feasible and acceptable, but further research is needed to assess the effectiveness of this service delivery approach and to assure high-quality services and pharmaceutical regulation to complement PrEP provision.

## **Introduction**

HIV pre-exposure prophylaxis (PrEP) is the use of antiretroviral drugs by HIV-uninfected individuals to prevent HIV infection. PrEP may either be taken orally in a daily pill (generally containing tenofovir plus emtricitabine), event-driven (at the time of sex), or in the form of a dapivirine vaginal ring; recent data suggest that long-acting injectable PrEP may soon be an additional option. The World Health Organization (WHO) recommends that people at substantial risk of HIV infection should be offered PrEP as an additional prevention choice as part of a combination prevention approach [1] which includes integration of sexual and reproductive health (SRH), HIV, and sexually transmitted infections (STI) services.[2]

Novel approaches to service delivery are being developed to expand PrEP access. Within clinical services, PrEP has been provided through community health clinics, sexually transmitted disease clinics, and primary care providers.[3] Community health workers have been trained to conduct PrEP outreach and provide referrals to PrEP prescription services.[4] There are also mobile applications that offer PrEP prescriptions from a qualified provider but without an in-person visit.[5] Making PrEP available outside of formal health facilities has the potential to reduce barriers to access, improve autonomy, and increase use and coverage of these effective HIV prevention options. It also may be a way to reach people who could benefit from PrEP but do not feel comfortable attending a clinic.

Pharmacies have been described as one area of untapped potential for PrEP delivery.[6-8] Pharmacies are often more accessible than health facilities, as they are usually conveniently located within communities, may have longer hours (including nights and weekends), and are available without an appointment. They also serve a wide range of health issues, so may reduce stigma associated with seeking HIV-related services. However, writing or filling PrEP prescriptions is not within pharmacists' scope of practice in many settings, so considering expansion of PrEP to pharmacies must be done with consideration of local regulatory guidelines.

This systematic review evaluates the evidence for distributing PrEP through pharmacies. We conducted this systematic review in the context of expanding the evidence base of WHO's normative guidance on self-care interventions.[9]. This guidance includes recommendations for over-the-counter pharmacy access to oral contraceptives as a means to expand access and coverage and is linked to WHO's competency-based training of pharmacists.[10] This review is also being conducted in response to the COVID-19 pandemic that has seen overstretched health systems and closures of medical facilities due to country-wide lockdowns globally [11] and where multi-month prescribing, including for clients initiating PrEP,[12] has been prioritized by WHO where appropriate.

## **Methods**

This review addressed two related questions: whether PrEP *initiation* should happen in pharmacies, and whether PrEP *continuation* should happen in pharmacies. We reviewed the extant literature in three areas relevant to answering these questions: effectiveness of the intervention, values and preferences of end users and providers, and cost information. The review followed PRISMA guidelines [13] and the joint protocol for these questions was

published on PROSPERO (CRD42021231650). Ethical approval was not required for this systematic review, since all data came from information freely available in the public domain (i.e. published articles or conference abstracts).

## Effectiveness review

### PICO question 1 - initiation

Should PrEP initiation be available following screening by a pharmacist, without a prescription?

**Population:** Individuals interested in PrEP

**Intervention:** PrEP access through a pharmacy without a prescription by a health care provider

**Comparator:** PrEP access by prescription from a health care provider

#### **Outcomes:**

- (1) Uptake of PrEP (initial use)
- (2) Continuation of PrEP (continued use or an intermittent pattern of use related to risk exposure)
- (3) Correct use of PrEP (either daily or event-driven), including stopping and starting
- (4) HIV acquisition/incidence
- (5) Side effects, adverse events, and clinical harms (renal disease, sexually transmitted infection (STI) acquisition, STI treatment)
- (6) Uptake of regular HIV testing (1 month after initiation and 3 monthly thereafter while taking PrEP – or if taking PrEP intermittently (seasons of risk) – prior to starting another period of PrEP)
- (7) Self-efficacy, self-determination, autonomy, empowerment
- (8) Social harms (e.g., coercion, violence (including intimate partner violence, violence from family members or community members, etc.), psychosocial harm, self-harm, etc.), and whether these harms were corrected/had redress available.

### PICO question 2 - continuation

Should PrEP continuation be available from a pharmacist, without a prescription?

**Population:** Individuals taking PrEP

**Intervention:** PrEP access through a pharmacy without a prescription by a health care provider

**Comparator:** PrEP access by prescription from a health care provider

#### **Outcomes:**

- (1) Use of PrEP (continued use or an intermittent pattern of use related to risk exposure)
- (2) Correct use of PrEP (either daily or event-driven), including stopping and starting
- (3) HIV acquisition/incidence
- (4) Side effects, adverse events, and clinical harms (renal disease, STI acquisition, STI treatment)
- (5) Uptake of regular HIV testing (1 month after initiation and 3 monthly thereafter while taking PrEP – or if taking PrEP intermittently (seasons of risk) – prior to starting another period of PrEP)
- (6) Self-efficacy, self-determination, autonomy, empowerment



- 1  
2  
3 (7) Social harms (e.g., coercion, violence (including intimate partner violence, violence from  
4 family members or community members, etc.), psychosocial harm, self-harm, etc.), and  
5 whether these harms were corrected/had redress available.  
6  
7

### 8 **Inclusion criteria**

9  
10 To be included in the effectiveness review for either PICO question, an article had to meet the  
11 following criteria:  
12

- 13  
14 1) Study design that compared PrEP access through a pharmacy without a prescription by a  
15 health care provider to PrEP access by prescription from a health care provider. This  
16 included both randomized controlled trials, non-randomized controlled trials, and  
17 comparative observational studies (including prospective controlled cohort studies, cross-  
18 sectional studies, controlled before-after studies and interrupted time series) that compare  
19 individuals who received the intervention to those who did not.  
20  
21 2) Measured one or more of the outcomes listed above.  
22  
23 3) Published in a peer-reviewed journal or as a conference abstract.

24 If studies met all other criteria but did not present comparative data, we considered them “case  
25 studies”. No restrictions were placed based on location of the intervention. No language  
26 restrictions were used on the search. Articles in English, French, Spanish, and Chinese were  
27 coded directly; articles in other languages were translated.  
28

### 29 **Search strategy**

30  
31  
32 The following electronic databases were searched through the search date of November 30,  
33 2020: PubMed, CINAHL, LILACS and EMBASE. We searched for ongoing RCTs through  
34 clinicaltrials.gov, the WHO International Clinical Trials Registry Platform, the Pan-African  
35 Clinical Trials Registry, and the Australian New Zealand Clinical Trials Registry. We searched  
36 abstracts from the following conferences: International AIDS Conference (AIDS), International  
37 AIDS Society Conference on HIV Science (IAS), International AIDS Society Conference on  
38 HIV Pathogenesis, Treatment, and Prevention, HIV Research for Prevention, and Retroviruses  
39 and Opportunistic Infections (CROI), and HIV Research for Prevention (HIVR4P). Only  
40 abstracts available electronically were included. Secondary reference searching was conducted  
41 on all studies included in the review. Finally, selected experts in the field were contacted to  
42 identify additional articles not identified through other search methods.  
43  
44  
45

### 46 **Search terms**

47  
48 The following search strategy (PubMed) was adapted for entry into all computer databases.  
49 These search terms were used both for the main effectiveness systematic review (PICO  
50 questions) and for the values and preferences and cost reviews (described below).  
51

52 (“Pre-Exposure Prophylaxis” [Mesh] OR “pre-exposure prophylaxis” [tiab] OR  
53 “preexposure prophylaxis” [tiab] OR “antiretroviral prophylaxis” [tiab] OR “preexposure  
54 chemoprophylaxis” [tiab] OR PrEP [tiab])  
55  
56  
57  
58  
59  
60

1  
2  
3  
4 AND

5  
6 (“Nonprescription Drugs” [Mesh] OR nonprescription [tiab] OR “over the counter” [tiab]  
7 OR “over-the-counter” [tiab] OR “without a prescription” [tiab] OR “pharmacist-  
8 prescribed” [tiab] OR “pharmacy access” [tiab] OR "clinician-prescribed" [tiab] OR  
9 "physician-prescribed" [tiab] OR "GP-prescribed" [tiab] OR "general practitioner  
10 prescribed" [tiab] OR “without prescription” [tiab] OR "community pharmacy services"  
11 [Mesh] OR pharmacy [tiab] OR pharmacist [tiab])  
12  
13

14 AND

15 (HIV)  
16  
17  
18

### 19 **Screening abstracts**

20  
21 Titles, abstracts, citation information, and descriptor terms of citations identified through the  
22 search strategy were screened by a member of the senior study staff. Full-text articles were  
23 obtained of all selected abstracts and two independent reviewers assessed all full-text articles for  
24 eligibility to determine final study selection. Differences were resolved through consensus.  
25  
26

### 27 **Data extraction and management**

28  
29 Data were extracted independently by two reviewers using standardized data extraction forms.  
30 Differences in data extraction were resolved through consensus and referral to a senior study  
31 team member from WHO when necessary.  
32  
33

34 The coding form collected the following information from each included study:  
35

- 36 • Study identification: Author(s); type of citation; year of publication
- 37 • Study description: Study objectives; location; population characteristics; type of PrEP;  
38 PrEP initiation or continuation; study design; sample size; follow-up periods and loss to  
39 follow-up
- 40 • Outcomes: Analytic approach; outcome measures; comparison groups; effect sizes;  
41 confidence intervals; significance levels; conclusions; limitations  
42  
43

44  
45 For randomized trials, risk of bias was assessed using the Cochrane Collaboration’s tool for  
46 assessing risk of bias.[14] For non-randomized trials but comparative studies, study rigor was  
47 assessed using the Evidence Project 8-item checklist for intervention evaluations.[15]  
48

### 49 **Data analysis**

50  
51 Data were analyzed according to coding categories and outcomes. Where multiple studies  
52 reported the same comparative outcome, we planned to conduct meta-analysis using random-  
53 effects models to combine risk ratios with Comprehensive Meta-Analysis (CMA).  
54  
55  
56  
57  
58  
59  
60

We planned to stratify all PICO analyses by the following categories/subgroups (and intersections of these groups), where data were available:

- Type of PrEP (daily oral pill, event-driven, dapivirine vaginal ring, etc.)
- Populations (e.g. age, gender, race/ethnicity, key populations (men who have sex with men [MSM], sex workers, people who use drugs, transgender people, prisoners), etc.)
- Vulnerabilities (i.e. poverty, disability, literacy/educational level)
- High-income versus low or middle-income countries
- Condom use

We planned to summarize PICO findings in GRADE Evidence Profile tables using GRADEPro. Case studies were summarized descriptively according to coding categories and outcomes.

### **Values and preferences review**

The same search terms were used to search and screen for studies on the values and preferences of end users and providers. Studies were included in this review if they presented primary data examining preferences of PrEP users, or individuals who might be or represent candidates for PrEP. We also included studies examining the values and preferences of healthcare providers, including pharmacists and community health workers. From these populations, we sought studies examining opinions, perspectives, values, and preferences related to PrEP access through pharmacies, or comparing PrEP access through pharmacies with other access points. We also considered issues related to age of availability, informed decision-making, coercion, seeking redress, and stigma and discrimination (anticipated and experienced) in accessing PrEP through pharmacies. These studies could be qualitative or quantitative in nature, but had to present primary data collection – think pieces and review articles were not included. Values and preferences literature were summarized qualitatively and were organized by study design and methodology, location, and population.

### **Cost review**

The same search terms were used to search and screen for studies to be included in the cost review. Studies were included in this review if they presented primary data comparing costing, cost-effectiveness, cost-utility, or cost-benefit of PrEP initiation or continuation in pharmacies. Cost literature was summarized qualitatively. Cost literature was classified into four categories (health sector costs, other sector costs, patient/family costs, and productivity impacts) and within each category was organized by study design/methodology, location, and population.

### **Patient and public involvement**

Feedback on the review protocol and analysis was received from the WHO patient safety working group. Patients were involved in a global survey of values and preferences conducted to inform the WHO guideline on self-care interventions; they thus play a significant role in the overall recommendation informed by this review.

### **Results**

1  
2  
3  
4 Our search strategy yielded 253 unique records, of which 17 were ultimately included in the  
5 systematic review (Figure 1). Of these 17 studies, 0 were included in the effectiveness review but  
6 7 were included as case studies, 11 were included in the values and preferences review, and 3  
7 were included in the cost review.  
8  
9

## 10 **Figure 1. PRISMA flow diagram showing disposition of citations through the search and** 11 **screening process**

### 12 **Effectiveness review**

13  
14 No articles met the inclusion criteria for the primary PICO questions, either PrEP initiation or  
15 continuation.  
16  
17

18  
19 However, we did identify seven “case studies” where PrEP was offered through pharmacies, but  
20 where there was no data comparing this to provision by prescription only. These were reported  
21 collectively in six articles and three abstracts.[16-24]  
22  
23

24 Table 1 presents descriptive information about the seven case studies. All seven case studies  
25 were conducted in urban areas in the United States of America (USA), although they came from  
26 diverse regions and served diverse populations. Most described operation through a collaborative  
27 practice agreement (CPA), where pharmacists operated under physician oversight to conduct  
28 activities that might otherwise be considered beyond their scope of practice. Most of the case  
29 studies described PrEP programs that provided client counseling and risk assessment, lab testing,  
30 and PrEP dispensing. In some cases, PrEP was initiated at the pharmacy and then patients had  
31 the option to continue elsewhere, while in other cases continuation occurred at the pharmacy.  
32  
33

34 Case studies provided descriptive data on the number of clients they served; some reported  
35 additional data on client demographics, test results, and PrEP continuation. Where distribution of  
36 clients by sex and sexual orientation was reported, programs said a majority of clients were male,  
37 and most were MSM. One study reported no differences in PrEP initiation or retention by client  
38 sex.[16] Client race varied substantially by setting, from 83.3% white [22] to 77% Black [16] to  
39 47% Hispanic/Latino [17]. Insurance coverage varied, from 35% [16] to 80% [22] of PrEP  
40 clients.  
41  
42

43 One large case study from Seattle enrolled 695 clients on PrEP;[21] the remaining case studies  
44 reported smaller PrEP enrollments of between 50-200 clients. Across studies, among clients who  
45 were referred for PrEP or completed a PrEP screening visit, between 59% (n=56/95) [19] and  
46 96% (n=51/53) [17] started PrEP or filled their prescription, often on the same day or within a  
47 week.  
48  
49

50 Follow-up rates varied. In one study, 43% (23/53) of clients who filled their prescription  
51 attended their initial clinical appointment within 6 weeks of obtaining PrEP [16]. Another study  
52 reported 81% (45/56) retention after 9 months.[19] The largest study reported a 25% drop-out  
53 rate and a mean duration of PrEP use of 302 days.[21]  
54  
55  
56  
57  
58  
59  
60

1  
2  
3 Three studies reported on HIV seroconversions among clients: two reported no seroconversions  
4 among PrEP clients,[19, 23, 24] and the third reported no seroconversions among active clients,  
5 but one seroconversion among a client who was lost to follow-up but then returned for PrEP and  
6 was diagnosed upon HIV testing at the return visit.[21] Two studies also reported HIV post-  
7 exposure prophylaxis (PEP): one reported started 2 of 56 patients on PEP prior to initiation of  
8 PrEP,[19] while another reported 6 clients receiving PEP.[17]  
9  
10  
11  
12  
13  
14  
15  
16  
17  
18  
19  
20  
21  
22  
23  
24  
25  
26  
27  
28  
29  
30  
31  
32  
33  
34  
35  
36  
37  
38  
39  
40  
41  
42  
43  
44  
45  
46  
47  
48  
49  
50  
51  
52  
53  
54  
55  
56  
57  
58  
59  
60

**Table 1. Description of articles included in the case study review**

| Study                      | Location                     | Description                                                                                                                                                                                                                                                                                                                                                                                                                                                                                                                                                                                                                                                                                                                                                                                                                                                                                                                                                                       | Results                                                                                                                                                                                                                                                                                                                                                                                                                                                                             |
|----------------------------|------------------------------|-----------------------------------------------------------------------------------------------------------------------------------------------------------------------------------------------------------------------------------------------------------------------------------------------------------------------------------------------------------------------------------------------------------------------------------------------------------------------------------------------------------------------------------------------------------------------------------------------------------------------------------------------------------------------------------------------------------------------------------------------------------------------------------------------------------------------------------------------------------------------------------------------------------------------------------------------------------------------------------|-------------------------------------------------------------------------------------------------------------------------------------------------------------------------------------------------------------------------------------------------------------------------------------------------------------------------------------------------------------------------------------------------------------------------------------------------------------------------------------|
| Ryan et al., 2018 [23, 24] | USA: Albuquerque, New Mexico | One of the first pharmacy-run HIV PrEP clinics in the USA was established in July 2015.                                                                                                                                                                                                                                                                                                                                                                                                                                                                                                                                                                                                                                                                                                                                                                                                                                                                                           | Over 200 patients have been seen at the PrEP clinic; the half-day weekly clinic generally sees 10-14 patients. There were no HIV seroconversions among those who started PrEP. Of the first 136 clients, 2 tested HIV-positive at baseline and 127 were started on PrEP (TDF/FDC). One discontinued due to side effects. No significant elevation in serum creatinine was noted over time. Adherence was average of <1 missed doses per month and a median compliance rate of 0.99. |
| Havens et al., 2019 [22]   | USA: Omaha, Nebraska         | Pharmacist-led PrEP (P-PrEP) allowed pharmacists to serve as PrEP providers through the utilization of a collaborative practice agreement (CPA). Pharmacists were provided additional education on HIV risk assessment, testing, risk reduction counseling, and administration of PrEP. Upon completion of training, P-PrEP pharmacists assumed responsibility for the PrEP care of individuals enrolled in P-PrEP through the CPA. Eligible P-PrEP participants were provided a 90-day F/TDF prescription. Participants had the option to continue PrEP care at the university-based HIV clinic or at 1 of 3 participating sites (community pharmacy, university-based primary care clinic, or community primary care clinic). Participants presented for follow-up visits every 3 months after PrEP initiation, and laboratory monitoring was performed. At all follow-up sites, a sample of whole blood by finger stick was collected for HIV screening and urine, rectal, and | 60 participants enrolled in the P-PrEP program and started F/TDF. The majority, 91.7% (55/60), were men, 83.3% (50/60) were white, 80% (48/60) were commercially insured, and 89.8% (54/60) had completed some college or higher. The mean age of participants was 34 years (range, 20–61 years), and 88.3% (53/60) identified as MSM.                                                                                                                                              |

1  
2  
3  
4  
5  
6  
7  
8  
9  
10  
11  
12  
13  
14  
15  
16  
17  
18  
19  
20  
21  
22  
23  
24  
25  
26  
27  
28  
29  
30  
31  
32  
33  
34  
35  
36  
37  
38  
39  
40  
41  
42  
43  
44  
45  
46  
47

|                                     |                                |                                                                                                                                                                                                                                                                                                                                                                                                                    |                                                                                                                                                                                                                                                                                                                                                                                                                                                                                                                                                      |
|-------------------------------------|--------------------------------|--------------------------------------------------------------------------------------------------------------------------------------------------------------------------------------------------------------------------------------------------------------------------------------------------------------------------------------------------------------------------------------------------------------------|------------------------------------------------------------------------------------------------------------------------------------------------------------------------------------------------------------------------------------------------------------------------------------------------------------------------------------------------------------------------------------------------------------------------------------------------------------------------------------------------------------------------------------------------------|
|                                     |                                | pharyngeal specimens were obtained for <i>Chlamydia trachomatis</i> and <i>Neisseria gonorrhoeae</i> .                                                                                                                                                                                                                                                                                                             |                                                                                                                                                                                                                                                                                                                                                                                                                                                                                                                                                      |
| Khosropour et al., 2020 [16]        | USA: Jackson, Mississippi      | The pharmacist evaluated patients for medical contraindications to PrEP, but no baseline labs were obtained. The pharmacist provided a PrEP prescription and scheduled a clinical appointment for patients within 6 weeks, at which time they were evaluated by a clinician and completed baseline labs.                                                                                                           | The pharmacist evaluated 69 patients for PrEP; 57% were MSM, 77% were black, and 65% were uninsured. All patients received a PrEP prescription; 83% received the prescription the same day and 97% received it within 5 days. Fifty-three (77%) of 69 clients filled the prescription; 87% of whom filled it within 1 week. Only 23 (43%) of 53 clients who filled their prescription attended their initial clinical appointment within 6 weeks of obtaining PrEP. There were no differences in PrEP initiation or retention by patient sex/gender. |
| Lopez et al., 2020 [17]             | USA: San Francisco, California | A community pharmacy and the Department of Public Health (DPH) developed a CPA that allowed community pharmacists to initiate PrEP and PEP. Pharmacists were trained by DPH staff members on HIV testing and counseling and implementation of the PrEP protocol, including PEP initiation and STI testing. A DPH physician reviewed patients' charts regularly and communicated with PrEP pharmacists as needed.   | In the first year, 6 patients received PEP and 53 patients completed a PrEP initiation visit, of whom 96% (n = 51) filled their prescription. Approximately 47% (n=24) of clients who started PrEP self-identified as Hispanic or Latino, 10% (n=5) were black or African American, and 82% (n=42) identified as MSM.                                                                                                                                                                                                                                |
| Sawkin & Shah, 2016 (abstract) [18] | USA: Kansas City, Missouri     | Clinical pharmacists were trained and approved by the chief medical officer to provide HIV PrEP education and medication therapy management services outlined within a CPA. The protocol included details of screening patients and procedures for both baseline and follow-up visits for patients initiating PrEP therapy. Clinical protocol orders at the screening visit include rapid HIV testing, hepatitis C | In the first year, the PrEP clinic had more than 50 actively managed patients.                                                                                                                                                                                                                                                                                                                                                                                                                                                                       |

|                                                 |                                |                                                                                                                                                                                                                                                                                                                                                                                                                                                                               |                                                                                                                                                                                                                                                                                                                                                                    |
|-------------------------------------------------|--------------------------------|-------------------------------------------------------------------------------------------------------------------------------------------------------------------------------------------------------------------------------------------------------------------------------------------------------------------------------------------------------------------------------------------------------------------------------------------------------------------------------|--------------------------------------------------------------------------------------------------------------------------------------------------------------------------------------------------------------------------------------------------------------------------------------------------------------------------------------------------------------------|
|                                                 |                                | screening, urinalysis, pregnancy testing, complete blood count with differential, comprehensive metabolic profile, STI screening, and hepatitis B serology. Once deemed eligible for therapy after reviewing pertinent lab data, a pharmacist may prescribe TDF/FDC once daily for no more than 90 days to ensure medication safety and efficacy. Patients follow up every 3 months for routine labs including rapid HIV testing, a basic metabolic panel, and STD screening. |                                                                                                                                                                                                                                                                                                                                                                    |
| Smith et al., 2019 (abstract) [19]              | USA: Atlanta, Georgia          | Pharmacy-based tele-PrEP program. PrEP services were provided directly to the community and through a consultative support program for all clinical sites within the hospital system. The key pilot interventions included developing a user-friendly electronic medical record-based PrEP order sets and brief provider education interventions in 6 primary care clinics.                                                                                                   | Over 9 months, 95 referrals were received, 56 (59%) of whom started PrEP. Two patients were started on PEP prior to initiation of PrEP. Forty-five patients (81%) remained on PrEP. Six clients were diagnosed with 9 STIs on screening (4 syphilis, 2 gonorrhea, 2 chlamydia, 1 lymphogranuloma venereum). There were no HIV seroconversions in patients on PrEP. |
| Tung et al., 2017 (abstract) [20] and 2018 [21] | USA: Seattle, Washington state | The One-Step PrEP™ clinic, at a private pharmacy and under physician oversight (1 PGY1, 3 pharmacists, ancillary staff), provides PrEP with a single patient encounter. Pharmacists meet with patients individually, take a medical and sexual history, make a risk assessment, perform laboratory testing, provide patient education, and prescribe and dispense oral PrEP (TDF/FTC) when appropriate.                                                                       | Of 714 patients evaluated, 695 (97.3%) initiated PrEP. Mean duration of PrEP use was 302 days. Same-day medication start: 513 (74%). Drop-out rate: 25%. STI diagnoses: 207 in 135 patients. HIV diagnoses: 2 at initial evaluation, 0 during active engagement, 1 after being LTFU.                                                                               |



## Values and Preferences Review

For the values and preferences review, 11 studies were identified, including one study that was also included in the case study review.[22, 25-30] The majority (n=8) were conducted in the USA, but two were conducted in Kenya, and one was conducted in South Africa. Seven used quantitative methods, generally cross-sectional surveys, while four used qualitative methods, generally in-depth interviews.

Table 2 presents descriptive data for the values and preferences studies, stratified by end users (including potential PrEP candidates, current PrEP users, or general populations), or pharmacists, healthcare providers and other professional stakeholders. Two studies included both potential end users and providers. Table 3 presents findings from the values and preferences studies. Six studies from the USA, Kenya, and South Africa found potential PrEP clients generally supported PrEP prescriptions in pharmacies, though some preferred clinics. For example, a discrete choice experiment focused on long-acting PrEP options among youth in South Africa noted that location of PrEP access was relatively less important than other attributes such as dosing frequency, pain, or insertion site, but that different populations expressed different location preferences: women preferred health clinic access, men who have sex with women only preferred community locations, and MSM preferred pharmacy or health clinics.[29] One study of current PrEP pharmacy users found all would “definitely recommend” the program.[22]. Six studies found pharmacists were generally supportive of offering PrEP;[22, 27, 31-34] one study including doctors found less support, and one study of diverse Kenyan stakeholders found broad support.[34] Benefits of pharmacy access included convenience, accessibility, and alignment with scope of work. Concerns included inadequate time, compensation for services, privacy, and training.

**Table 2. Descriptions of values and preferences studies**

| Study                                                  | Location                                                   | Population Description                 | Study design | Methods                                      | Sample size (n) |
|--------------------------------------------------------|------------------------------------------------------------|----------------------------------------|--------------|----------------------------------------------|-----------------|
| <b>End users</b>                                       |                                                            |                                        |              |                                              |                 |
| Begnel et al., 2020 [25]                               | Kenya: Homa Bay, Kisii, Kisumu, Migori, Nyamira, and Siaya | Adults aged 18+                        | Quantitative | Cross-sectional SMS survey                   | 2498            |
| Crawford et al., 2020 [27]                             | USA: Atlanta area, Georgia                                 | Adult MSM                              | Qualitative  | Semi-structured in-depth interviews          | 8               |
| Crawford et al., 2020 [26]                             | USA: Atlanta, Georgia                                      | HIV- MSM not using PrEP                | Quantitative | Cross-sectional survey                       | 259             |
| Havens et al., 2019 [22]                               | USA: Omaha, Nebraska                                       | PrEP users                             | Quantitative | Cross-sectional survey in case study project | 60              |
| Lutz et al., 2020 [28]                                 | USA: Arizona                                               | HIV- PrEP clients and HIV+ ART clients | Quantitative | Cross-sectional survey                       | 49              |
| Minnis et al., 2020 [29]                               | South Africa: Nyanga and Masiphumelele, near Cape Town     | PrEP-eligible youth aged 18-24         | Quantitative | Discrete choice experiment                   | 807             |
| Zhu et al., 2020 [30]                                  | USA: Washington, DC and Maryland                           | HIV- adults                            | Quantitative | Cross-sectional survey                       | 117             |
| <b>Pharmacists and other professional stakeholders</b> |                                                            |                                        |              |                                              |                 |

|                             |                            |                                                                                                                         |              |                                              |     |
|-----------------------------|----------------------------|-------------------------------------------------------------------------------------------------------------------------|--------------|----------------------------------------------|-----|
| Broekhuis et al., 2018 [31] | USA: Nebraska and Iowa     | Pharmacists                                                                                                             | Quantitative | Cross-sectional online survey                | 140 |
| Crawford et al., 2020 [27]  | USA: Atlanta area, Georgia | Pharmacists                                                                                                             | Qualitative  | Semi-structured in-depth interviews          | 6   |
| Havens et al., 2019 [22]    | USA: Omaha, Nebraska       | Pharmacists                                                                                                             | Quantitative | Cross-sectional survey in case study project | 7   |
| Hopkins et al., 2020 [32]   | USA: Atlanta, Georgia      | Pharmacists and pharmacy technicians                                                                                    | Qualitative  | Semi-structured in-depth interviews          | 13  |
| Koester et al., 2020 [33]   | USA: California            | Pharmacists, physicians, pharmacy representatives                                                                       | Qualitative  | Semi-structured phone interviews             | 11  |
| Ortblad et al., 2020 [34]   | Kenya: Nairobi             | Stakeholders from PrEP regulatory, professional, healthcare service delivery, civil society, and research organizations | Qualitative  | Focus groups                                 | 36  |

MSM: men who have sex with men; ART: antiretroviral therapy

**Table 3. Key findings from values and preferences studies**

| Study            | Location | Results |
|------------------|----------|---------|
| <b>End users</b> |          |         |

|                                                                      |                                                        |              |                                                                                                                                                                                                                                                                                                                                                                                                                                                                                                                                                                                                                            |
|----------------------------------------------------------------------|--------------------------------------------------------|--------------|----------------------------------------------------------------------------------------------------------------------------------------------------------------------------------------------------------------------------------------------------------------------------------------------------------------------------------------------------------------------------------------------------------------------------------------------------------------------------------------------------------------------------------------------------------------------------------------------------------------------------|
| 1<br>2<br>3<br>4<br>5<br>6                                           | Begnel et al., 2020 [25]                               | Kenya        | When asked whether someone would be most likely to obtain PrEP at a clinic, pharmacy, kiosk, or other location, 44% chose clinics, 37% chose pharmacies, 17% chose kiosks, and 1% chose other.                                                                                                                                                                                                                                                                                                                                                                                                                             |
| 7<br>8<br>9<br>10                                                    | Crawford et al., 2020 [26]                             | USA          | Most participants (69%) were willing to discuss PrEP with pharmacy staff and 61.35% were willing to be screened for PrEP in pharmacy. There were no differences by race, after accounting for PrEP interest.                                                                                                                                                                                                                                                                                                                                                                                                               |
| 11<br>12<br>13<br>14                                                 | Crawford et al., 2020 [27]                             | USA          | Most MSM supported in-pharmacy STI, HIV, and PrEP screenings and dissemination. Benefits included convenience and accessibility. Participants wanted to ensure privacy, confidentiality, and welcoming staff for MSM.                                                                                                                                                                                                                                                                                                                                                                                                      |
| 15<br>16<br>17                                                       | Havens et al., 2019 [22]                               | USA          | At 6-month follow-up, all of the survey respondents stated they would definitely recommend the P-PrEP program.                                                                                                                                                                                                                                                                                                                                                                                                                                                                                                             |
| 18<br>19<br>20<br>21                                                 | Lutz et al., 2020 [28]                                 | USA          | 93.9% were comfortable seeing a pharmacist to discuss PrEP, and 93.9% were comfortable having a pharmacist test for HIV before starting PrEP. 83.7% were comfortable having a pharmacist prescribe PrEP, although only 4 participants (8.2%) strongly agreed.                                                                                                                                                                                                                                                                                                                                                              |
| 22<br>23<br>24<br>25<br>26<br>27<br>28                               | Minnis et al., 2020 [29]                               | South Africa | In this discrete choice experiment about hypothetical long-acting PrEP options, "where PrEP is available" was relatively less important than other attributes such as dosing frequency, pain, or injection site. Females preferred using a product that was offered at a health clinic over accessing it at a pharmacy ( $p < 0.001$ ). Among males, men who have sex with women only had somewhat more preference for availability at a community location compared with a pharmacy and health clinic, whereas MSM held opposite views with pharmacy or health clinic preferred over a community location ( $p = 0.01$ ). |
| 29<br>30<br>31<br>32<br>33<br>34                                     | Zhu et al., 2020 [30]                                  | USA          | Most participants supported pharmacists prescribing PrEP (Mean 4.0 (SD = 1.0), range 3.9 to 4.1 on a scale of 1-5 with 5 strongly agree). Most (58.1%) had no concerns; the most common concerns were "prefer to obtain a prescription from my doctor" (16.2%) and "privacy concerns" (15.4%). Participants were more likely to support pharmacy PrEP if they had previous interactions with pharmacists or if they had previously used PrEP (vs. non-users).                                                                                                                                                              |
| 35                                                                   | <b>Pharmacists and other professional stakeholders</b> |              |                                                                                                                                                                                                                                                                                                                                                                                                                                                                                                                                                                                                                            |
| 36<br>37<br>38<br>39<br>40<br>41<br>42<br>43<br>44<br>45<br>46<br>47 | Broekhuis et al., 2018 [31]                            | USA          | Respondents were "moderately concerned" or "very concerned" about the following issues: time burden (61%), inadequate compensation for services (55%), outside skill set (39%), patient adherence to therapy (63%), loss to follow-up (56%), and promotion of antiretroviral drug resistance (51%).                                                                                                                                                                                                                                                                                                                        |

|                                                                                                                                                                                                                                                                               |                            |       |                                                                                                                                                                                                                                                                                                                                                                                                                                                                                                                                                                                                                                                                                |
|-------------------------------------------------------------------------------------------------------------------------------------------------------------------------------------------------------------------------------------------------------------------------------|----------------------------|-------|--------------------------------------------------------------------------------------------------------------------------------------------------------------------------------------------------------------------------------------------------------------------------------------------------------------------------------------------------------------------------------------------------------------------------------------------------------------------------------------------------------------------------------------------------------------------------------------------------------------------------------------------------------------------------------|
| 1<br>2<br>3<br>4<br>5<br>6<br>7<br>8<br>9<br>10<br>11<br>12<br>13<br>14<br>15<br>16<br>17<br>18<br>19<br>20<br>21<br>22<br>23<br>24<br>25<br>26<br>27<br>28<br>29<br>30<br>31<br>32<br>33<br>34<br>35<br>36<br>37<br>38<br>39<br>40<br>41<br>42<br>43<br>44<br>45<br>46<br>47 | Crawford et al., 2020 [27] | USA   | Although STI, HIV, and PrEP services were not currently available, all pharmacists expressed considerable support for providing these services within their pharmacies.                                                                                                                                                                                                                                                                                                                                                                                                                                                                                                        |
|                                                                                                                                                                                                                                                                               | Havens et al., 2019 [22]   | USA   | The P-PrEP pharmacists felt comfortable performing point of care testing at all visits except on 1 occasion (0.7%, 1 of 139). 1 pharmacist at the community pharmacy site reported 3 occasions (2.2%) in which they felt uncomfortable conducting sexual histories during P-PrEP follow-up visits. Workflow disruption at the community pharmacy site was reported only once (0.7%) throughout the study.                                                                                                                                                                                                                                                                      |
|                                                                                                                                                                                                                                                                               | Hopkins et al., 2020 [32]  | USA   | Pharmacists and pharmacy technicians expressed strong willingness and support for screening and dispensing PrEP in pharmacies. Both groups expressed concerns about the time and the resources needed to perform PrEP screening and dispensing. Technicians also reported concerns about privacy for patients as well as the need for community support and awareness of pharmacy-based PrEP screening, and they recommended scheduling of PrEP screening activities during a limited part of the day to facilitate screening. Pharmacists reported fewer barriers but a need for more training of pharmacy staff to assist with PrEP screening and dispensing implementation. |
|                                                                                                                                                                                                                                                                               | Koester et al., 2020 [33]  | USA   | Participants felt benefits included accessibility (longer pharmacy hours and accessible staff and locations), access to refill data to counsel on adherence, and alignment with other medications already given by pharmacists. Barriers included questions about who would cover costs and potential lack of privacy and training. Medical providers were not entirely supportive of expanding the pharmacists' scope of practice to include PrEP due to concerns about training to handle potential complications or other health issues that might present.                                                                                                                 |
|                                                                                                                                                                                                                                                                               | Ortblad et al., 2020 [34]  | Kenya | Stakeholders were enthusiastic about a model for pharmacy-based PrEP delivery. Potential challenges identified included insufficient pharmacy provider knowledge and skills, regulatory hurdles to providing affordable HIV testing at pharmacies, and undefined pathways for PrEP procurement. Potential solutions included having pharmacy providers complete the Kenya Ministry of Health-approved PrEP training, use of a PrEP prescribing checklist with remote clinician oversight and provider-assisted HIV self-testing, and having the government provide PrEP and HIV self-testing kits to pharmacies during a pilot test.                                           |

## Cost review

Two of the case studies presented data about health sector costs and patient/family costs,[20-22] and one values and preferences article also examined willingness to pay for PrEP.[25] No studies looked at other sector costs or productivity impacts. Both case studies were conducted in the USA. For health sector costs, one clinic reported it recouped start-up costs in 9 months, and financial sustainability was dependent on the ability of pharmacists to bill insurance plans for their services.[20, 21] For patient/family costs, 98% of patients paid US\$0 for their PrEP in one study, and in another, participants were split in willingness to pay US\$20 or US\$60 quarterly for PrEP visits.[20, 21] Finally, one article from Kenya found over half of participants were willing to pay for PrEP and 78% said the maximum they would pay for a month's supply was <US\$5.[25]

**Table 4. Description of articles included in the cost review**

| Study                                           | Location                       | Results                                                                                                                                                                                                                                                                                                                                                                                                                                                                 |
|-------------------------------------------------|--------------------------------|-------------------------------------------------------------------------------------------------------------------------------------------------------------------------------------------------------------------------------------------------------------------------------------------------------------------------------------------------------------------------------------------------------------------------------------------------------------------------|
| Begnel et al., 2020 [25]                        | Kenya                          | Over half (61%) of participants were willing to pay for PrEP and 78% reported that the maximum amount they were willing to pay for a one-month supply was <\$5.                                                                                                                                                                                                                                                                                                         |
| Havens et al., 2019 [22]                        | USA: Omaha, Nebraska           | Among participants who completed follow-up visits at the community pharmacy, half (6 of 12) stated they would be willing to pay at least \$20 quarterly for continued PrEP visits and half (6 of 12) were willing to pay up to \$60 quarterly.                                                                                                                                                                                                                          |
| Tung et al., 2017 (abstract) [20] and 2018 [21] | USA: Seattle, Washington state | In the 2017 abstract, 96% of patients (235/245) paid \$0 for their PrEP. Initial startup costs were recouped after 9 months of operations. In the 2018 article, 98% of patients paid \$0 for their PrEP (total n=695). Financial sustainability of the model was dependent on the ability of pharmacists to bill insurance plans for their services in accordance with local legislative changes requiring commercial insurances to recognize pharmacists as providers. |

## Discussion

This systematic review identified no studies for our primary PICO questions, indicating a paucity of evidence investigating the comparative effectiveness of pharmacy- versus provider-access to PrEP, for individuals initiating or continuing PrEP. However, we did identify seven non-comparative case studies which provide some limited evidence on the feasibility of pharmacy distribution of PrEP. Although all were from the USA, all found pharmacy-access PrEP to be a feasible service delivery model.

The evidence base identified in our review was largely focused on the USA, with just three values and preferences studies and one cost study from sub-Saharan African settings. This represents a critical gap in the literature given global differences in pharmacy regulation and capacity, particularly in many settings with high HIV prevalence. Pharmacies in the USA are subject to substantial regulations, and pharmacists generally receive high levels of training and

oversight, which may enable provision of high-quality services for PrEP through pharmacies. In other settings, training and regulation may be more variable, making quality control more challenging. Notably, most of the case studies specifically described using CPAs which require physician oversight of pharmacist provision of PrEP. Most of the study pharmacies either had laboratory capacity or were well-connected with laboratories, providing an avenue for baseline tests and ongoing monitoring needed for PrEP. Where links with laboratories do not exist, it will be important to consider how they might be created to ensure appropriate support for PrEP initiation and continuation.[7] However, these models were found to be highly feasible with few adverse outcomes, warranting further research in a wider range of settings.

In terms of values and preferences, we found that actual or potential PrEP clients were generally supportive of pharmacy-access PrEP. Many included studies did not describe in-depth reasons for or against pharmacy PrEP. In the USA, MSM emphasized the importance of privacy, confidentiality, and having welcoming staff.[22, 27, 30] One study from South Africa highlighted the role of subgroup differences, finding that preferences for potential long-acting PrEP differed between women, MSM, and men who have sex with women.[29] These differences align with previous findings about user preferences for PrEP delivery more broadly.[35, 36] Further, even within subpopulations (e.g. women), heterogeneity is to be expected as user preferences may be shaped by geographic, economic, and sociocultural contexts.[37]

In particular, we found that pharmacy delivery of PrEP was highly accepted among marginalized groups, such as Black MSM in the south of the USA.[16, 26, 27] As these groups face critical barriers to accessing PrEP through more traditional modalities, pharmacy PrEP may be an important additional option for them.[38] Understanding the perspectives of other groups often excluded from research on PrEP users' values and preferences, such as transgender people, sex workers, or people who use drugs, is also critical.[35]

Evidence from providers indicated mixed support for pharmacy-access PrEP. Some had concerns about the added time associated with a new task, though one of our included case studies found that workflow disruption was minimal.[22] Concerns about insufficient training and skills to provide PrEP were common.[31-34] While guidelines and clinical requirements at PrEP visits vary across settings,[39] pharmacists require training and supervision to provide HIV and creatinine clearance testing at a minimum, along with pregnancy testing, STI screening, and other diagnostic tests depending on setting and population. Training may also be required regarding other aspects of integrated SRH, such as contraceptive provision or referral for people at risk of violence. For instance, lockdowns during the COVID-19 pandemic have limited access to health services, and task sharing to pharmacists can support a range of health interventions. The WHO Academy [10] module on counselling and prescribing of contraception in pharmacies has developed competency-based learning for pharmacists which could be further extended to other health areas, including provision of PrEP. Along with training and supervision, strategies to support laboratory access – whether on-site or elsewhere – will be key to offering PrEP through pharmacies. This might require changes to supply chain systems to ensure uninterrupted supply of PrEP medications for pharmacies, as well as changes to health management information systems to ensure that pharmacy-level activities can be captured. Furthermore, monitoring of

1  
2  
3 pharmacy-access PrEP would have to become part of routine monitoring efforts in order to help  
4 ensure quality service provision.  
5

6  
7 Two of our included studies assessed client willingness to pay for pharmacy-access PrEP.  
8 Willingness to pay ranged from US\$5 per month in Kenya [25] to as much as US\$20 per month  
9 in the USA [22]. In terms of overall financial sustainability of the PrEP pharmacy model, in the  
10 USA, one study found this was achievable but entirely dependent on insurance billing. Since  
11 costs and willingness to pay will vary substantially by income, setting, and health system or  
12 insurance/reimbursement structure, further research in this area is needed. Additional evidence  
13 could elucidate cost differences in countries where national health insurance programs partner  
14 with pharmacies, compared to those where government services are generally provided for free  
15 or at low-cost. Broadly, given the high HIV burden and rapid scale-up of PrEP in sub-Saharan  
16 Africa,[40, 41] more costing data from this region is needed. For example, some African PrEP  
17 programs have adopted models wherein service delivery costs are shared across interventions  
18 through shared service platforms.[42-44] It may be that integrating PrEP into pharmacies offers  
19 similar opportunities for cost-sharing across programs and interventions;[45] this warrants  
20 further exploration.  
21  
22  
23

24 While the studies included in our review all focused on daily oral PrEP except for one  
25 hypothetical values and preferences study on long-acting injectable PrEP, the monthly dapivirine  
26 vaginal ring is included in the WHO list of prequalified products and in recent WHO guidelines  
27 [46] as an additional prevention choice for women. Its high safety profile and low systemic  
28 absorption reduce requirements for laboratory monitoring may make pharmacy delivery and  
29 option for established women users. Long-acting injectable PrEP (cabotegravir), which is given  
30 by intramuscular injection every 8 weeks, is likely to gain regulatory approval and could  
31 potentially be considered in the future for pharmacy provision, if complexities with HIV testing  
32 and other implementation issues are resolved. Long-acting injectable PrEP formulations have  
33 been viewed favorably by potential end-users.[47] Future studies should consider not only the  
34 safety and effectiveness of delivering long-acting PrEP products such as the dapivirine vaginal  
35 ring and long-acting injectable PrEP at pharmacies, but also user and provider preferences  
36 around this delivery option. These interventions might also be considered as part of a broader  
37 package of SRH-related services that could be managed to the pharmacy-level, which might help  
38 maximize efficiencies and minimize stigma associated with standalone HIV interventions.  
39  
40  
41

42 Our review had several strengths and limitations. We conducted a comprehensive search for  
43 articles not only on effectiveness, but also on values and preferences of end users and providers  
44 as well as cost data. However, our focus on peer-reviewed articles and conference abstracts may  
45 have missed some relevant information from program reports or other grey literature. Our  
46 conclusions are also limited because nearly all the evidence identified in our review came from  
47 the USA, except for a few studies from Kenya and South Africa. Future research should continue  
48 to examine the potential for pharmacy provision of PrEP in resource-limited settings.  
49  
50

## 51 **Conclusions**

52  
53  
54 Overall, we found that while pharmacy distribution of PrEP has been shown to be feasible in  
55 some studies in the USA and valued by end users in small studies, there is a lack of evidence  
56  
57  
58  
59



1  
2  
3 around its effectiveness or its adaptability to low- and middle-income settings. As PrEP services  
4 continue to expand worldwide, additional research and programmatic efforts into pharmacy  
5 delivery are warranted. The services, staffing, infrastructure, and regulation of pharmacies varies  
6 considerably between and within countries; if PrEP products are to be delivered through these  
7 settings, minimum service requirements and staff training needs will need to be considered. With  
8 the increasing roll-out of PrEP across regions, more evidence from safety monitoring may reduce  
9 laboratory monitoring requirements, and the COVID-19 pandemic has led to adaptations to  
10 support continuation of PrEP delivery such as the use of HIV self-testing, virtual platforms, and  
11 telemedicine support. Future implementation research could explore how these could be  
12 incorporated into future PrEP pharmacy models. This evidence base should be informed by  
13 variation across contexts, screening and laboratory requirements, and values and preferences of  
14 affected populations and health workers. Privacy, confidentiality, and quality of services will be  
15 important to ensure for all clients. Overall, pharmacy access may be a promising strategy for  
16 expanding access to PrEP, improving equity, and helping to respect, protect and fulfil the right to  
17 health.  
18  
19  
20

21  
22 **Acknowledgements:** We thank Johns Hopkins graduate students Hunied Kautsar, Jingjia  
23 (Cynthia) Li, and Xuhao Yang for their help screening citations and coding articles for this  
24 review. We also thank Shona Dalal, Robin Schaefer, Michelle Rodolph, and Nandi Siegfried for  
25 their thoughtful comments on the protocol and/or draft manuscript.  
26

27  
28 **Contributions:** MN conceptualized the study, following discussion with RB. CK and PTY  
29 designed the protocol, with feedback from MN, RB, and LF. PTY ran the database search and  
30 oversaw the search, screening, full text review, and data extraction process. CK and KA drafted  
31 the manuscript. All authors reviewed the draft, provided critical review, and read and approved  
32 the final manuscript. The corresponding author, as guarantor, accepts full responsibility for the  
33 finished article has access to any data and controlled the decision to publish. The corresponding  
34 author attests that all listed authors meet the authorship criteria and that no others meeting the  
35 criteria have been omitted.  
36

37  
38 The named authors alone are responsible for the views expressed in this publication and do not  
39 necessarily represent the decisions or the policies of the World Health Organization (WHO) or  
40 the UNDP-UNFPA-UNICEF-WHO-World Bank Special Programme of Research, Development  
41 and Research Training in Human Reproduction (HRP).  
42

43  
44 **Financial support:** We gratefully acknowledge financial support of The Children's Investment  
45 Fund Foundation (CIFF). The funder played no part in the decision to submit the article for  
46 publication, nor in the collection, analysis and interpretation of data. All authors had full access  
47 to all of the data in the study and can take responsibility for the integrity of the data and the  
48 accuracy of the data analysis.  
49

50  
51 **Competing interests:** None declared.

52  
53 **Patient consent for publication:** Not required.

54  
55 **Provenance and peer review:** Not commissioned; externally peer reviewed.  
56  
57  
58  
59  
60

1  
2  
3  
4 **Ethics statement:** Ethical approval was not required for this systematic review, since all data  
5 came from published articles.  
6

7  
8 **Data availability statement:** Extracted data are available on request to the corresponding  
9 author.  
10

11 **Transparency declaration:** The corresponding author, as guarantor, affirms that the manuscript  
12 is an honest, accurate, and transparent account of the study being reported; that no important  
13 aspects of the study have been omitted; and that any discrepancies from the study as planned  
14 (and, if relevant, registered) have been explained.  
15  
16  
17  
18  
19  
20  
21  
22  
23  
24  
25  
26  
27  
28  
29  
30  
31  
32  
33  
34  
35  
36  
37  
38  
39  
40  
41  
42  
43  
44  
45  
46  
47  
48  
49  
50  
51  
52  
53  
54  
55  
56  
57  
58  
59  
60

## References

1. World Health O: **Guidelines: updated recommendations on HIV prevention, infant diagnosis, antiretroviral initiation and monitoring**. Geneva: World Health Organization; 2021.
2. **Preventing HIV and other STIs among women and girls using contraceptive services in contexts with high HIV incidence: actions for improved clinical and prevention services and choices** [<https://www.who.int/publications/i/item/actions-for-improved-clinical-and-prevention-services-and-choices-preventing-hiv-and-other-stis-among-women-and-girls-using-contraceptive-services>]
3. Mayer KH, Chan PA, R RP, Flash CA, Krakower DS: **Evolving Models and Ongoing Challenges for HIV Preexposure Prophylaxis Implementation in the United States**. *Journal of acquired immune deficiency syndromes (1999)* 2018, **77**(2):119-127.
4. Farley JE, Dangerfield DT, 2nd, LaRicci J, Sacamano P, Heidari O, Lowensen K, Jennings JM, Tobin KE: **Community engagement and linkage to care efforts by peer community-health workers to increase PrEP uptake among sexual minority men**. *Public Health Nurs* 2021.
5. Touger R, Wood BR: **A Review of Telehealth Innovations for HIV Pre-Exposure Prophylaxis (PrEP)**. *Current HIV/AIDS reports* 2019, **16**(1):113-119.
6. Myers JE, Farhat D, Guzman A, Arya V: **Pharmacists in HIV Prevention: An Untapped Potential**. *American Journal of Public Health* 2019, **109**(6):859-861.
7. Lopez MI, Grant RM, Dong BJ: **Community pharmacy delivered PrEP to STOP HIV transmission: An opportunity NOT to miss!** *Journal of the American Pharmacists Association : JAPhA* 2020, **60**(4):e18-e24.
8. Farmer EK, Koren DE, Cha A, Grossman K, Cates DW: **The Pharmacist's Expanding Role in HIV Pre-Exposure Prophylaxis**. *AIDS patient care and STDs* 2019, **33**(5):207-213.
9. WHO: **WHO consolidated guideline on self-care interventions for health: sexual and reproductive health and rights**. In. Geneva, Switzerland: World Health Organization; 2019.
10. WHO Academy [<https://www.who.int/about/who-academy>]
11. WHO: **Maintaining essential health services: operational guidance for the COVID-19 context interim guidance**. In. Geneva, Switzerland: World Health Organization; 2020.
12. **Maintaining essential health services: operational guidance for the COVID-19 context interim guidance** [<https://www.who.int/publications/i/item/WHO-2019-nCoV-essential-health-services-2020.1>]
13. Moher D, Liberati A, Tetzlaff J, Altman DG: **Preferred reporting items for systematic reviews and meta-analyses: the PRISMA statement**. *PLoS medicine* 2009, **6**(7):e1000097.
14. **Cochrane Handbook for Systematic Reviews of Interventions**. In. Edited by Higgins JPT, Thomas J, Chandler J, Cumpston M, Li T, Page MJ, Welch VA; 2019.
15. Kennedy CE, Fonner VA, Armstrong KA, Denison JA, Yeh PT, O'Reilly KR, Sweat MD: **The Evidence Project risk of bias tool: assessing study rigor for both randomized and non-randomized intervention studies**. *Systematic Reviews* 2019, **8**(1):3.

16. Khosropour CM, Backus KV, Means AR, Beauchamps L, Johnson K, Golden MR, Mena L: **A Pharmacist-Led, Same-Day, HIV Pre-Exposure Prophylaxis Initiation Program to Increase PrEP Uptake and Decrease Time to PrEP Initiation.** *AIDS patient care and STDs* 2020, **34**(1):1-6.
17. Lopez MI, Cocohoba J, Cohen SE, Trainor N, Levy MM, Dong BJ: **Implementation of pre-exposure prophylaxis at a community pharmacy through a collaborative practice agreement with San Francisco Department of Public Health.** *Journal of the American Pharmacists Association : JAPhA* 2020, **60**(1):138-144.
18. Sawkin M, Shah M: **Development of a pharmacist-led human immunodeficiency virus pre-exposure prophylaxis clinic at an urban community clinic.** *Journal of the American Pharmacists Association* 2016, **56**(3):e48.
19. Smith BL, Hester AM, Cantos VD, James TR, Lora MH: **A pharmacist-led PrEP program at the epicenter of the HIV epidemic in atlanta; our experience.** *Open forum infectious diseases* 2019, **6**:S461.
20. Tung E, Thomas A, Eichner A, Shalit P: **Feasibility of a pharmacist-run HIV PrEP clinic in a community pharmacy setting.** *Topics in Antiviral Medicine* 2017, **25**(1):407s.
21. Tung EL, Thomas A, Eichner A, Shalit P: **Implementation of a community pharmacy-based pre-exposure prophylaxis service: a novel model for pre-exposure prophylaxis care.** *Sexual health* 2018, **15**(6):556-561.
22. Havens JP, Scarsi KK, Sayles H, Klepser DG, Swindells S, Bares SH: **Acceptability and feasibility of a pharmacist-led HIV pre-exposure prophylaxis (PrEP) program in the Midwestern United States.** *Open forum infectious diseases* 2019, **6**(10).
23. Ryan K, Lewis J, Sanchez D, Anderson B, Mercier RC: **The next step in prep: Evaluating outcomes of a pharmacist-run HIV pre-exposure prophylaxis (PREP) clinic.** *Open forum infectious diseases* 2018, **5**:S395.
24. Ryan KL, Jakeman B, Conklin J, Pineda LJ, Deming P, Mercier R-C: **Treatment of patients with HIV or hepatitis C by pharmacist clinicians in a patient-centered medical home.** *American Journal of Health-System Pharmacy* 2019, **76**(11):821-828.
25. Begnel ER, Escudero J, Mugambi M, Mugwanya K, Kinuthia J, Beima-Sofie K, Dettinger JC, Baeten JM, John-Stewart G, Pintye J: **High pre-exposure prophylaxis awareness and willingness to pay for pre-exposure prophylaxis among young adults in Western Kenya: results from a population-based survey.** *International journal of STD & AIDS* 2020, **31**(5):454-459.
26. Crawford ND, Albarran T, Chamberlain A, Hopkins R, Josma D, Morris J, Onwubiko UN: **Willingness to Discuss and Screen for Pre-Exposure Prophylaxis in Pharmacies Among Men Who Have Sex With Men.** *Journal of pharmacy practice* 2020:897190020904590.
27. Crawford ND, Josma D, Morris J, Hopkins R, Young HN: **Pharmacy-based pre-exposure prophylaxis support among pharmacists and men who have sex with men.** *Journal of the American Pharmacists Association : JAPhA* 2020, **60**(4):602-608.
28. Lutz S, Heberling M, Goodlet KJ: **Patient perspectives of pharmacists prescribing HIV pre-exposure prophylaxis: A survey of patients receiving antiretroviral therapy.** *Journal of the American Pharmacists Association : JAPhA* 2020.
29. Minnis AM, Atujuna M, Browne EN, Nduwayana S, Hartmann M, Sindelo S, Ngcwayi N, Boeri M, Mansfield C, Bekker LG *et al*: **Preferences for long-acting Pre-Exposure**

- 1  
2  
3  
4 **Prophylaxis (PrEP) for HIV prevention among South African youth: results of a**  
5 **discrete choice experiment.** *Journal of the International AIDS Society* 2020,  
6 **23(6):e25528.**
- 7 30. Zhu V, Tran D, Banjo O, Onuegbu R, Seung H, Layson-Wolf C: **Patient perception of**  
8 **community pharmacists prescribing pre-exposure prophylaxis for HIV prevention.**  
9 *Journal of the American Pharmacists Association : JAPhA* 2020, **60(6):781-781.**
- 10 31. Broekhuis JM, Scarsi KK, Sayles HR, Klepser DG, Havens JP, Swindells S, Bares SH:  
11 **Midwest pharmacists' familiarity, experience, and willingness to provide pre-**  
12 **exposure prophylaxis (PrEP) for HIV.** *PloS one* 2018, **13(11):e0207372.**
- 13 32. Hopkins R, Josma D, Morris J, Klepser DG, Young HN, Crawford ND: **Support and**  
14 **perceived barriers to implementing pre-exposure prophylaxis screening and**  
15 **dispensing in pharmacies: Examining concordance between pharmacy technicians**  
16 **and pharmacists.** *Journal of the American Pharmacists Association : JAPhA* 2020.
- 17 33. Koester KA, Saberi P, Fuller SM, Arnold EA, Steward WT: **Attitudes about community**  
18 **pharmacy access to HIV prevention medications in California.** *Journal of the*  
19 *American Pharmacists Association : JAPhA* 2020:e179-e183.
- 20 34. Ortblad KF, Mogere P, Roche S, Kamolloh K, Odoyo J, Irungu E, Mugo NR, Pintye J,  
21 Baeten JM, Bukusi E *et al*: **Design of a care pathway for pharmacy-based PrEP**  
22 **delivery in Kenya: results from a collaborative stakeholder consultation.** *BMC health*  
23 *services research* 2020, **20(1):1034.**
- 24 35. Eakle R, Weatherburn P, Bourne A: **Understanding user perspectives of and**  
25 **preferences for oral PrEP for HIV prevention in the context of intervention scale-**  
26 **up: a synthesis of evidence from sub-Saharan Africa.** *Journal of the International*  
27 *AIDS Society* 2019, **22 Suppl 4(Suppl Suppl 4):e25306.**
- 28 36. Koechlin FM, Fonner VA, Dalglish SL, O'Reilly KR, Baggaley R, Grant RM, Rodolph  
29 M, Hodges-Mameletzis I, Kennedy CE: **Values and Preferences on the Use of Oral**  
30 **Pre-exposure Prophylaxis (PrEP) for HIV Prevention Among Multiple Populations:**  
31 **A Systematic Review of the Literature.** *AIDS and behavior* 2017, **21(5):1325-1335.**
- 32 37. Minnis AM, Browne EN, Boeri M, Agot K, van der Straten A, Ahmed K, Weinrib R,  
33 Mansfield C: **Young Women's Stated Preferences for Biomedical HIV Prevention:**  
34 **Results of a Discrete Choice Experiment in Kenya and South Africa.** *Journal of*  
35 *acquired immune deficiency syndromes (1999)* 2019, **80(4):394-403.**
- 36 38. Edeza A, Karina Santamaria E, Valente PK, Gomez A, Ogunbajo A, Biello K:  
37 **Experienced barriers to adherence to pre-exposure prophylaxis for HIV prevention**  
38 **among MSM: a systematic review and meta-ethnography of qualitative studies.**  
39 *AIDS care* 2020:1-9.
- 40 39. World Health Organization: **Guideline on when to start antiretroviral therapy and on**  
41 **pre-exposure prophylaxis for HIV;** 2015.
- 42 40. Ahmed N, Pike C, Bekker LG: **Scaling up pre-exposure prophylaxis in sub-Saharan**  
43 **Africa.** *Current opinion in infectious diseases* 2019, **32(1):24-30.**
- 44 41. Irungu EM, Baeten JM: **PrEP rollout in Africa: status and opportunity.** *Nature*  
45 *medicine* 2020, **26(5):655-664.**
- 46 42. South Africa National Department of Health: **Guidelines for the Provision of Pre-**  
47 **exposure Prophylaxis (PrEP) to Persons at Substantial Risk of HIV Infection.** In.,  
48 vol. 1; 2020.
- 49  
50  
51  
52  
53  
54  
55  
56  
57  
58  
59  
60

- 1  
2  
3  
4  
5  
6  
7  
8  
9  
10  
11  
12  
13  
14  
15  
16  
17  
18  
19  
20  
21  
22  
23  
24  
25  
26  
27  
28  
29  
30  
31  
32  
33  
34  
35  
36  
37  
38  
39  
40  
41  
42  
43  
44  
45  
46  
47  
48  
49  
50  
51  
52  
53  
54  
55  
56  
57  
58  
59  
60
43. National AIDS & STI Control Program: **Framework for the Implementation of Pre-Exposure Prophylaxis of HIV In Kenya**. In.: Kenya Ministry of Health,; 2017.
  44. Zimbabwe Ministry of Health and Child Care: **Implementation Plan for HIV Pre-Exposure Prophylaxis in Zimbabwe**. In.; 2017.
  45. Roberts DA, Barnabas RV, Abuna F, Lagat H, Kinuthia J, Pintye J, Bochner AF, Forsythe S, Gomez GB, Baeten JM *et al*: **The role of costing in the introduction and scale-up of HIV pre-exposure prophylaxis: evidence from integrating PrEP into routine maternal and child health and family planning clinics in western Kenya**. *Journal of the International AIDS Society* 2019, **22 Suppl 4**(Suppl Suppl 4):e25296.
  46. WHO: **Updated recommendations on HIV prevention, infant diagnosis, antiretroviral initiation and monitoring**. 2021.
  47. Clement ME, Kofron R, Landovitz RJ: **Long-acting injectable cabotegravir for the prevention of HIV infection**. *Curr Opin HIV AIDS* 2020, **15**(1):19-26.

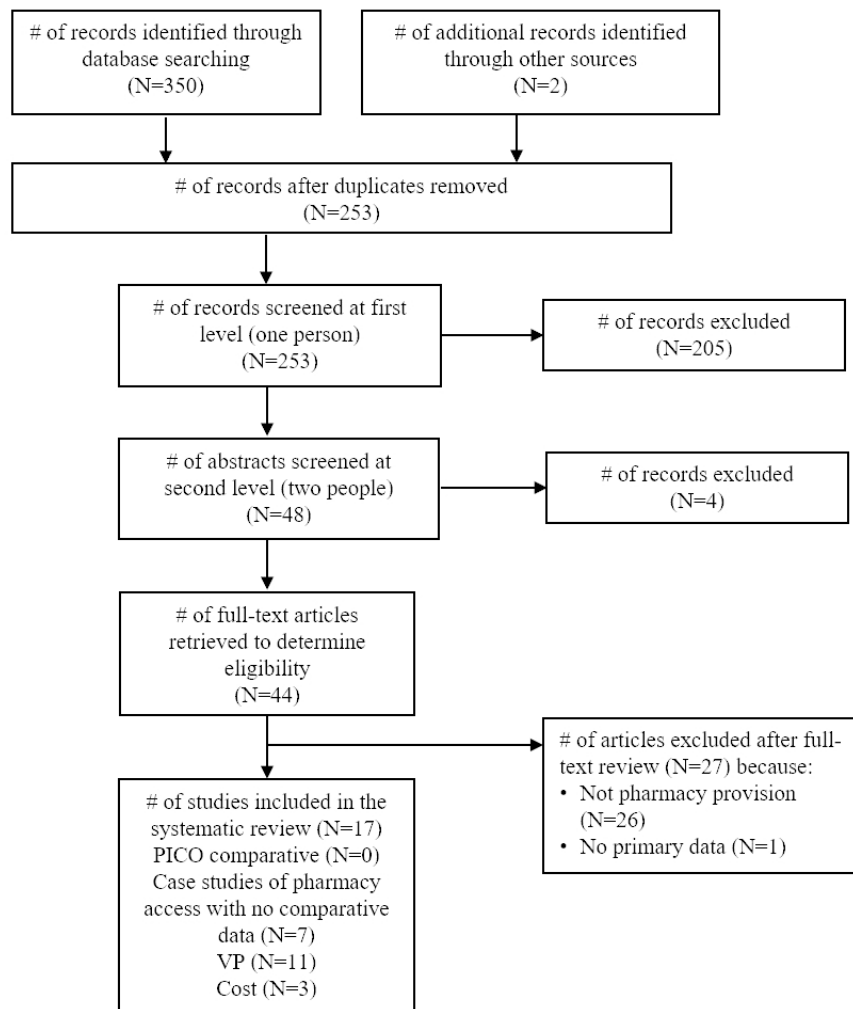

40 Figure 1. PRISMA flow diagram showing disposition of citations through the search and screening process

41  
42  
43  
44  
45  
46  
47  
48  
49  
50  
51  
52  
53  
54  
55  
56  
57  
58  
59  
60

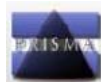

# PRISMA 2009 Checklist

| Section/topic                      | #  | Checklist item                                                                                                                                                                                                                                                                                              | Reported on page # |
|------------------------------------|----|-------------------------------------------------------------------------------------------------------------------------------------------------------------------------------------------------------------------------------------------------------------------------------------------------------------|--------------------|
| <b>TITLE</b>                       |    |                                                                                                                                                                                                                                                                                                             |                    |
| Title                              | 1  | Identify the report as a systematic review, meta-analysis, or both.                                                                                                                                                                                                                                         | 1                  |
| <b>ABSTRACT</b>                    |    |                                                                                                                                                                                                                                                                                                             |                    |
| Structured summary                 | 2  | Provide a structured summary including, as applicable: background; objectives; data sources; study eligibility criteria, participants, and interventions; study appraisal and synthesis methods; results; limitations; conclusions and implications of key findings; systematic review registration number. | 2                  |
| <b>INTRODUCTION</b>                |    |                                                                                                                                                                                                                                                                                                             |                    |
| Rationale                          | 3  | Describe the rationale for the review in the context of what is already known.                                                                                                                                                                                                                              | 4                  |
| Objectives                         | 4  | Provide an explicit statement of questions being addressed with reference to participants, interventions, comparisons, outcomes, and study design (PICOS).                                                                                                                                                  | 4-6                |
| <b>METHODS</b>                     |    |                                                                                                                                                                                                                                                                                                             |                    |
| Protocol and registration          | 5  | Indicate if a review protocol exists, if and where it can be accessed (e.g., Web address), and, if available, provide registration information including registration number.                                                                                                                               | 5                  |
| Eligibility criteria               | 6  | Specify study characteristics (e.g., PICOS, length of follow-up) and report characteristics (e.g., years considered, language, publication status) used as criteria for eligibility, giving rationale.                                                                                                      | 4-6                |
| Information sources                | 7  | Describe all information sources (e.g., databases with dates of coverage, contact with study authors to identify additional studies) in the search and date last searched.                                                                                                                                  | 6                  |
| Search                             | 8  | Present full electronic search strategy for at least one database, including any limits used, such that it could be repeated.                                                                                                                                                                               | 6-7                |
| Study selection                    | 9  | State the process for selecting studies (i.e., screening, eligibility, included in systematic review, and, if applicable, included in the meta-analysis).                                                                                                                                                   | 7                  |
| Data collection process            | 10 | Describe method of data extraction from reports (e.g., piloted forms, independently, in duplicate) and any processes for obtaining and confirming data from investigators.                                                                                                                                  | 7                  |
| Data items                         | 11 | List and define all variables for which data were sought (e.g., PICOS, funding sources) and any assumptions and simplifications made.                                                                                                                                                                       | 7                  |
| Risk of bias in individual studies | 12 | Describe methods used for assessing risk of bias of individual studies (including specification of whether this was done at the study or outcome level), and how this information is to be used in any data synthesis.                                                                                      | 7                  |
| Summary measures                   | 13 | State the principal summary measures (e.g., risk ratio, difference in means).                                                                                                                                                                                                                               | 7                  |
| Synthesis of results               | 14 | Describe the methods of handling data and combining results of studies, if done, including measures of consistency (e.g., $I^2$ ) for each meta-analysis.                                                                                                                                                   | NA                 |



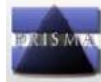

# PRISMA 2009 Checklist

Page 1 of 2

| Section/topic                 | #  | Checklist item                                                                                                                                                                                           | Reported on page # |
|-------------------------------|----|----------------------------------------------------------------------------------------------------------------------------------------------------------------------------------------------------------|--------------------|
| Risk of bias across studies   | 15 | Specify any assessment of risk of bias that may affect the cumulative evidence (e.g., publication bias, selective reporting within studies).                                                             | NA                 |
| Additional analyses           | 16 | Describe methods of additional analyses (e.g., sensitivity or subgroup analyses, meta-regression), if done, indicating which were pre-specified.                                                         | 8                  |
| <b>RESULTS</b>                |    |                                                                                                                                                                                                          |                    |
| Study selection               | 17 | Give numbers of studies screened, assessed for eligibility, and included in the review, with reasons for exclusions at each stage, ideally with a flow diagram.                                          | 9                  |
| Study characteristics         | 18 | For each study, present characteristics for which data were extracted (e.g., study size, PICOS, follow-up period) and provide the citations.                                                             | 9-13               |
| Risk of bias within studies   | 19 | Present data on risk of bias of each study and, if available, any outcome level assessment (see item 12).                                                                                                | 9-13               |
| Results of individual studies | 20 | For all outcomes considered (benefits or harms), present, for each study: (a) simple summary data for each intervention group (b) effect estimates and confidence intervals, ideally with a forest plot. | 9-13               |
| Synthesis of results          | 21 | Present results of each meta-analysis done, including confidence intervals and measures of consistency.                                                                                                  | NA                 |
| Risk of bias across studies   | 22 | Present results of any assessment of risk of bias across studies (see Item 15).                                                                                                                          | NA                 |
| Additional analysis           | 23 | Give results of additional analyses, if done (e.g., sensitivity or subgroup analyses, meta-regression [see Item 16]).                                                                                    | NA                 |
| <b>DISCUSSION</b>             |    |                                                                                                                                                                                                          |                    |
| Summary of evidence           | 24 | Summarize the main findings including the strength of evidence for each main outcome; consider their relevance to key groups (e.g., healthcare providers, users, and policy makers).                     | 19-21              |
| Limitations                   | 25 | Discuss limitations at study and outcome level (e.g., risk of bias), and at review-level (e.g., incomplete retrieval of identified research, reporting bias).                                            | 21                 |
| Conclusions                   | 26 | Provide a general interpretation of the results in the context of other evidence, and implications for future research.                                                                                  | 21-22              |
| <b>FUNDING</b>                |    |                                                                                                                                                                                                          |                    |
| Funding                       | 27 | Describe sources of funding for the systematic review and other support (e.g., supply of data); role of funders for the systematic review.                                                               | 22                 |

From: Moher D, Liberati A, Tetzlaff J, Altman DG, The PRISMA Group (2009). Preferred Reporting Items for Systematic Reviews and Meta-Analyses: The PRISMA Statement. PLoS Med 6(7): e1000097. doi:10.1371/journal.pmed1000097

For more information, visit: [www.prisma-statement.org](http://www.prisma-statement.org).

Page 2 of 2

For peer review only - <http://bmjopen.bmj.com/site/about/guidelines.xhtml>

# BMJ Open

## PrEP distribution in pharmacies: a systematic review

|                                 |                                                                                                                                                                                                                                                                                                                                                                                                                                                                                                                                                                                                                                                                     |
|---------------------------------|---------------------------------------------------------------------------------------------------------------------------------------------------------------------------------------------------------------------------------------------------------------------------------------------------------------------------------------------------------------------------------------------------------------------------------------------------------------------------------------------------------------------------------------------------------------------------------------------------------------------------------------------------------------------|
| Journal:                        | <i>BMJ Open</i>                                                                                                                                                                                                                                                                                                                                                                                                                                                                                                                                                                                                                                                     |
| Manuscript ID                   | bmjopen-2021-054121.R1                                                                                                                                                                                                                                                                                                                                                                                                                                                                                                                                                                                                                                              |
| Article Type:                   | Original research                                                                                                                                                                                                                                                                                                                                                                                                                                                                                                                                                                                                                                                   |
| Date Submitted by the Author:   | 29-Oct-2021                                                                                                                                                                                                                                                                                                                                                                                                                                                                                                                                                                                                                                                         |
| Complete List of Authors:       | Kennedy, Caitlin; Johns Hopkins University Bloomberg School of Public Health, International Health<br>Yeh, Ping; Johns Hopkins University Bloomberg School of Public Health, Department of International Health<br>Atkins, Kaitlyn; Johns Hopkins University Bloomberg School of Public Health, Department of International Health<br>Ferguson, Laura; University of Southern California, Keck School of Medicine, Institute on Inequalities in Global Health<br>Baggaley, R; World Health Organization, Department of HIV, Viral Hepatitis, and STIs<br>Narasimhan, Manjulaa; World Health Organization, Department of Sexual and Reproductive Health and Research |
| <b>Primary Subject Heading</b>: | HIV/AIDS                                                                                                                                                                                                                                                                                                                                                                                                                                                                                                                                                                                                                                                            |
| Secondary Subject Heading:      | Public health, Health policy, Health services research                                                                                                                                                                                                                                                                                                                                                                                                                                                                                                                                                                                                              |
| Keywords:                       | Public health < INFECTIOUS DISEASES, HIV & AIDS < INFECTIOUS DISEASES, PREVENTIVE MEDICINE, Organisation of health services < HEALTH SERVICES ADMINISTRATION & MANAGEMENT                                                                                                                                                                                                                                                                                                                                                                                                                                                                                           |
|                                 |                                                                                                                                                                                                                                                                                                                                                                                                                                                                                                                                                                                                                                                                     |

SCHOLARONE™  
Manuscripts



I, the Submitting Author has the right to grant and does grant on behalf of all authors of the Work (as defined in the below author licence), an exclusive licence and/or a non-exclusive licence for contributions from authors who are: i) UK Crown employees; ii) where BMJ has agreed a CC-BY licence shall apply, and/or iii) in accordance with the terms applicable for US Federal Government officers or employees acting as part of their official duties; on a worldwide, perpetual, irrevocable, royalty-free basis to BMJ Publishing Group Ltd ("BMJ") its licensees and where the relevant Journal is co-owned by BMJ to the co-owners of the Journal, to publish the Work in this journal and any other BMJ products and to exploit all rights, as set out in our [licence](#).

The Submitting Author accepts and understands that any supply made under these terms is made by BMJ to the Submitting Author unless you are acting as an employee on behalf of your employer or a postgraduate student of an affiliated institution which is paying any applicable article publishing charge ("APC") for Open Access articles. Where the Submitting Author wishes to make the Work available on an Open Access basis (and intends to pay the relevant APC), the terms of reuse of such Open Access shall be governed by a Creative Commons licence – details of these licences and which [Creative Commons](#) licence will apply to this Work are set out in our licence referred to above.

Other than as permitted in any relevant BMJ Author's Self Archiving Policies, I confirm this Work has not been accepted for publication elsewhere, is not being considered for publication elsewhere and does not duplicate material already published. I confirm all authors consent to publication of this Work and authorise the granting of this licence.

## PrEP distribution in pharmacies: a systematic review

Caitlin E. Kennedy<sup>1</sup>, Ping Teresa Yeh<sup>1</sup>, Kaitlyn Atkins<sup>1</sup>, Laura Ferguson<sup>2</sup>, Rachel Baggaley<sup>3</sup>, Manjulaa Narasimhan<sup>4</sup>

<sup>1</sup> Department of International Health, Johns Hopkins Bloomberg School of Public Health, Baltimore, Maryland, USA. Caitlin E. Kennedy, Associate Professor. Ping Teresa Yeh, Research Associate. Kaitlyn Atkins, PhD Candidate.

<sup>2</sup> Institute on Inequalities in Global Health, Keck School of Medicine, University of Southern California, Los Angeles, California, USA. Laura Ferguson, Assistant Professor.

<sup>3</sup> Department of Global HIV, Hepatitis and STI Programmes, World Health Organization, Geneva, Switzerland. Rachel Baggaley, Coordinator of HIV testing, prevention and populations.

<sup>4</sup> Department of Sexual and Reproductive Health and Research, World Health Organization, includes the UNDP/UNFPA/UNICEF/WHO/World Bank Special Programme of Research, Development and Research Training in Human Reproduction – HRP, Geneva, Switzerland. Manjulaa Narasimhan, Scientist.

### Correspondence to:

Manjulaa Narasimhan

Department of Sexual and Reproductive Health and Research

UNDP/UNFPA/UNICEF/WHO/World Bank Special Programme

World Health Organization

20 Avenue Appia, 1211 Geneva 27, Switzerland

Email: [narasimhanm@who.int](mailto:narasimhanm@who.int)

**Word count:** 4207

## **Abstract**

**Introduction:** Novel mechanisms of service delivery are needed to expand access to pre-exposure prophylaxis (PrEP) for HIV prevention. Providing PrEP directly through pharmacies could offer an additional option for reaching potential users.

**Methods:** We conducted a systematic review of studies examining effectiveness, values and preferences of end users and health workers, and cost of PrEP initiation and continuation through pharmacies (pharmacy access). We searched PubMed, CINAHL, LILACS and EMBASE through December 2, 2020. We also searched clinical trial registries and recent HIV conference abstracts. Standardized methods were used to search, screen, and extract data from included studies.

**Results:** No studies met the inclusion criteria for the effectiveness review, for either PrEP initiation or continuation. However, six “case studies” presenting non-comparative data from PrEP pharmacy programs demonstrated feasibility of this model in the United States (US). Eleven studies reported values and preferences of end users and health workers. In the US, Kenya, and South Africa, potential PrEP clients generally supported pharmacy access, though some preferred clinics. One study of PrEP pharmacy clients found all would “definitely recommend” the program. Six studies found pharmacists were generally supportive of offering PrEP; one study including doctors found more limited favor, while one study of diverse Kenyan stakeholders found broad support. Three studies reported cost data indicating client willingness to pay in the US and Kenya and initial sustainability of a clinic financial model in the US.

**Conclusion:** Provision of PrEP through pharmacies has been demonstrated to be feasible in the US and acceptable to potential end users and stakeholders in multiple settings. Limited evidence on effectiveness and requirements for laboratory testing and assurance of high-quality services may limit enthusiasm for this approach. Further research is needed to determine if pharmacy access is a safe and effective way to help achieve global HIV prevention goals.

**Keywords:** PrEP, pharmacy, systematic review, values and preferences

**Systematic review registration number:** PROSPERO CRD42021231650

### **Strengths and limitations of this study**

- This systematic review used a comprehensive search for articles not only on the effectiveness of PrEP distribution through pharmacies, but also on costs of this model and values and preferences of end users and health workers.
- Because this is a rapidly growing field, we may have missed new publications or articles which used terms which were not in our search strategy.
- The generalizability of our findings globally may be limited, since nearly all evidence included in our review came from the USA besides a few studies from Kenya and South Africa.

For peer review only

## **Introduction**

HIV pre-exposure prophylaxis (PrEP) is the use of antiretroviral drugs by HIV-uninfected individuals to prevent HIV infection. PrEP may either be taken orally in a daily pill (generally containing tenofovir plus emtricitabine), event-driven (at the time of sex), or in the form of a dapivirine vaginal ring; recent data suggest that long-acting injectable PrEP may soon be an additional option. However, not all forms of PrEP are available in all settings globally; in most low-income countries, only daily oral PrEP is available. The World Health Organization (WHO) recommends that people at substantial risk of HIV infection should be offered PrEP as an additional prevention choice as part of a combination prevention approach<sup>1</sup> which includes integration of sexual and reproductive health (SRH), HIV, and sexually transmitted infections (STI) services.<sup>2</sup>

Novel approaches to service delivery are being developed to expand PrEP access. Within clinical services, PrEP has been provided through community health clinics, sexually transmitted disease clinics, and primary care providers.<sup>3</sup> Community health workers have been trained to conduct PrEP outreach and provide referrals to PrEP prescription services.<sup>4</sup> There are also mobile applications that offer PrEP prescriptions from a qualified health worker but without an in-person visit.<sup>5</sup> Making PrEP available outside of formal health facilities has the potential to reduce barriers to access, improve autonomy, and increase use and coverage of these effective HIV prevention options. It also may be a way to reach people who could benefit from PrEP but do not feel comfortable attending a clinic.

Pharmacies have been described as one area of untapped potential for PrEP delivery.<sup>6-8</sup> Pharmacies are often more accessible than health facilities, as they are usually conveniently located within communities, may have longer hours (including nights and weekends), and are available without an appointment. They also serve a wide range of health issues, so may reduce stigma associated with seeking HIV-related services. However, writing or filling PrEP prescriptions is not within pharmacists' scope of practice in many settings, so considering expansion of PrEP to pharmacies must be done with consideration of local regulatory guidelines.

This systematic review evaluates the evidence for distributing PrEP through pharmacies. We conducted this systematic review in the context of expanding the evidence base of WHO's normative guidance on self-care interventions.<sup>9</sup> This guidance includes recommendations for over-the-counter pharmacy access to oral contraceptives as a means to expand access and coverage and is linked to WHO's competency-based training of pharmacists.<sup>10</sup> This review is also being conducted in response to the COVID-19 pandemic that has seen overstretched health systems and closures of medical facilities due to country-wide lockdowns globally<sup>11</sup> and where multi-month prescribing, including for clients initiating PrEP,<sup>12</sup> has been prioritized by WHO where appropriate.

## **Methods**

This review addressed two related questions: whether PrEP *initiation* should happen in pharmacies, and whether PrEP *continuation* should happen in pharmacies. We focused on in-person pharmacy initiation and continuation, and excluded telemedicine-based approaches. We

1  
2  
3 reviewed the extant literature in three areas relevant to answering these questions: effectiveness  
4 of the intervention, values and preferences of end users and health workers, and cost information.  
5 The review followed PRISMA guidelines<sup>13</sup> and the joint protocol for these questions was  
6 published on PROSPERO (CRD42021231650). Ethical approval was not required for this  
7 systematic review, since all data came from information freely available in the public domain  
8 (i.e. published articles or conference abstracts).  
9

## 11 **Effectiveness review**

### 13 **PICO question 1 - initiation**

16 Should PrEP initiation be available following screening by a pharmacist, without a prescription?  
17

18 **Population:** Individuals interested in PrEP

19 **Intervention:** PrEP access through a pharmacy without a prescription by a health worker  
20 (defined as a non-pharmacist health worker)

21 **Comparator:** PrEP access by prescription from a health worker

#### 22 **Outcomes:**

- 23 (1) Uptake of PrEP (initial use)
- 24 (2) Continuation of PrEP (continued use or an intermittent pattern of use related to risk  
25 exposure)
- 26 (3) Correct use of PrEP (either daily or event-driven), including stopping and starting
- 27 (4) HIV acquisition/incidence
- 28 (5) Side effects, adverse events, and clinical harms (renal disease, sexually transmitted  
29 infection (STI) acquisition, STI treatment)
- 30 (6) Uptake of regular HIV testing (1 month after initiation and 3 monthly thereafter while  
31 taking PrEP – or if taking PrEP intermittently (seasons of risk) – prior to starting another  
32 period of PrEP)
- 33 (7) Self-efficacy, self-determination, autonomy, empowerment
- 34 (8) Social harms (e.g., coercion, violence (including intimate partner violence, violence from  
35 family members or community members, etc.), psychosocial harm, self-harm, etc.), and  
36 whether these harms were corrected/had redress available.  
37  
38  
39  
40

### 41 **PICO question 2 - continuation**

42  
43 Should PrEP continuation be available from a pharmacist, without a prescription?  
44  
45

46 **Population:** Individuals taking PrEP

47 **Intervention:** PrEP access through a pharmacy without a prescription by a health worker

48 **Comparator:** PrEP access by prescription from a health worker

#### 49 **Outcomes:**

- 50 (1) Use of PrEP (continued use or an intermittent pattern of use related to risk exposure)
- 51 (2) Correct use of PrEP (either daily or event-driven), including stopping and starting
- 52 (3) HIV acquisition/incidence
- 53 (4) Side effects, adverse events, and clinical harms (renal disease, STI acquisition, STI  
54 treatment)  
55  
56  
57  
58  
59  
60



- (5) Uptake of regular HIV testing (1 month after initiation and 3 monthly thereafter while taking PrEP – or if taking PrEP intermittently (seasons of risk) – prior to starting another period of PrEP)
- (6) Self-efficacy, self-determination, autonomy, empowerment
- (7) Social harms (e.g., coercion, violence (including intimate partner violence, violence from family members or community members, etc.), psychosocial harm, self-harm, etc.), and whether these harms were corrected/had redress available.

### **Inclusion criteria**

To be included in the effectiveness review for either PICO question, an article had to meet the following criteria:

- 1) Study design that compared PrEP access through a pharmacy without a prescription by a health worker to PrEP access by prescription from a health worker. This included both randomized controlled trials, non-randomized controlled trials, and comparative observational studies (including prospective controlled cohort studies, cross-sectional studies, controlled before-after studies and interrupted time series) that compare individuals who received the intervention to those who did not.
- 2) Measured one or more of the outcomes listed above.
- 3) Published in a peer-reviewed journal or as a conference abstract.

If studies met all other criteria but did not present comparative data, we considered them “case studies”. No restrictions were placed based on location of the intervention. No language restrictions were used on the search. Articles in English, French, Spanish, and Chinese were coded directly; articles in other languages were translated.

### **Search strategy**

The following electronic databases were searched through the search date of December 2, 2020: PubMed, CINAHL, LILACS and EMBASE. We searched for ongoing RCTs through clinicaltrials.gov, the WHO International Clinical Trials Registry Platform, the Pan-African Clinical Trials Registry, and the Australian New Zealand Clinical Trials Registry. We searched abstracts from the following conferences: International AIDS Conference (AIDS), International AIDS Society Conference on HIV Science (IAS), International AIDS Society Conference on HIV Pathogenesis, Treatment, and Prevention, HIV Research for Prevention, and Retroviruses and Opportunistic Infections (CROI), and HIV Research for Prevention (HIVR4P). Only abstracts available electronically were included. Secondary reference searching was conducted on all studies included in the review. Finally, selected experts in the field were contacted to identify additional articles not identified through other search methods. The full search strategy for databases, registries, and conference websites can be found in Appendix A.

### **Screening abstracts**

Titles, abstracts, citation information, and descriptor terms of citations identified through the search strategy were screened by a member of the senior study staff. Full-text articles were

1  
2  
3 obtained of all selected abstracts and two independent reviewers assessed all full-text articles for  
4 eligibility to determine final study selection. Differences were resolved through consensus.  
5

### 6 **Data extraction and management**

7  
8  
9 Data were extracted independently by two reviewers using standardized data extraction forms.  
10 Differences in data extraction were resolved through consensus and referral to a senior study  
11 team member from WHO when necessary.  
12

13 The coding form collected the following information from each included study:

- 14 • Study identification: Author(s); type of citation; year of publication
- 15 • Study description: Study objectives; location; population characteristics; type of PrEP;  
16 PrEP initiation or continuation; study design; sample size; follow-up periods and loss to  
17 follow-up
- 18 • Outcomes: Analytic approach; outcome measures; comparison groups; effect sizes;  
19 confidence intervals; significance levels; conclusions; limitations  
20  
21  
22  
23

24 For randomized trials, risk of bias was assessed using the Cochrane Collaboration's tool for  
25 assessing risk of bias.<sup>14</sup> For non-randomized trials but comparative studies, study rigor was  
26 assessed using the Evidence Project 8-item checklist for intervention evaluations.<sup>15</sup>  
27  
28

### 29 **Data analysis**

30  
31 Data were analyzed according to coding categories and outcomes. Where multiple studies  
32 reported the same comparative outcome, we planned to conduct meta-analysis using random-  
33 effects models to combine risk ratios with Comprehensive Meta-Analysis (CMA).  
34  
35

36 We planned to stratify all PICO analyses by the following categories/subgroups (and  
37 intersections of these groups), where data were available:  
38

- 39 • Type of PrEP (daily oral pill, event-driven, dapivirine vaginal ring, etc.)
- 40 • Populations (e.g. age, gender, race/ethnicity, key populations (men who have sex with  
41 men [MSM], sex workers, people who use drugs, transgender people, prisoners), etc.)
- 42 • Vulnerabilities (i.e. poverty, disability, literacy/educational level)
- 43 • High-income versus low or middle-income countries
- 44 • Condom use  
45  
46

47 We planned to summarize PICO findings in GRADE Evidence Profile tables using GRADEPro.  
48 Case studies were summarized descriptively according to coding categories and outcomes.  
49  
50

### 51 **Values and preferences review**

52  
53 The same search terms were used to search and screen for studies on the values and preferences  
54 of end users and health workers. Studies were included in this review if they presented primary  
55 data examining preferences of PrEP users, or individuals who might be or represent candidates  
56  
57  
58  
59  
60

1  
2  
3 for PrEP. We also included studies examining the values and preferences of health workers,  
4 including pharmacists and community health workers. From these populations, we sought studies  
5 examining opinions, perspectives, values, and preferences related to PrEP access through  
6 pharmacies, or comparing PrEP access through pharmacies with other access points. We also  
7 considered issues related to age of availability, informed decision-making, coercion, seeking  
8 redress, and stigma and discrimination (anticipated and experienced) in accessing PrEP through  
9 pharmacies. These studies could be qualitative or quantitative in nature, but had to present  
10 primary data collection – think pieces and review articles were not included. Values and  
11 preferences literature were summarized qualitatively and were organized by study design and  
12 methodology, location, and population.  
13  
14

### 15 16 **Cost review**

17  
18 The same search terms were used to search and screen for studies to be included in the cost  
19 review. Studies were included in this review if they presented primary data comparing costing,  
20 cost-effectiveness, cost-utility, or cost-benefit of PrEP initiation or continuation in pharmacies.  
21 Cost literature was summarized qualitatively. Cost literature was classified into four categories  
22 (health sector costs, other sector costs, patient/family costs, and productivity impacts) and within  
23 each category was organized by study design/methodology, location, and population.  
24  
25

### 26 **Patient and public involvement**

27  
28 Feedback on the review protocol and analysis was received from the WHO patient safety  
29 working group. Patients were involved in a global survey of values and preferences conducted to  
30 inform the WHO guideline on self-care interventions; they thus play a significant role in the  
31 overall recommendation informed by this review.  
32  
33

### 34 **Results**

35  
36 Our search strategy yielded 253 unique records, of which 16 were ultimately included in the  
37 systematic review (Figure 1). Of these 17 studies, 0 were included in the effectiveness review but  
38 6 were included as case studies, 11 were included in the values and preferences review, and 3  
39 were included in the cost review.  
40  
41

### 42 **Figure 1. PRISMA flow diagram showing disposition of citations through the search and 43 screening process**

#### 44 45 **Effectiveness review**

46  
47 No articles met the inclusion criteria for the primary PICO questions, either PrEP initiation or  
48 continuation.  
49  
50

51 However, we did identify six “case studies” where PrEP was offered through pharmacies, but  
52 where there was no data comparing this to provision by prescription only. These were reported  
53 collectively in six articles and two abstracts.<sup>16-23</sup>  
54  
55  
56  
57  
58  
59  
60

1  
2  
3 Table 1 presents descriptive information about the six case studies. All six case studies were  
4 conducted in urban areas in the United States of America (USA), although they came from  
5 diverse regions and served diverse populations. Most described operation through a collaborative  
6 practice agreement (CPA), where pharmacists operated under physician oversight. Most of the  
7 case studies described PrEP programs that provided client counseling and risk assessment, lab  
8 testing, and PrEP dispensing. In some cases, PrEP was initiated at the pharmacy and then  
9 patients had the option to continue elsewhere, while in other cases continuation occurred at the  
10 pharmacy.  
11  
12

13 Case studies provided descriptive data on the number of clients they served; some reported  
14 additional data on client demographics, test results, and PrEP continuation. Where distribution of  
15 clients by sex and sexual orientation was reported, programs said a majority of clients were male,  
16 and most were MSM. One study reported no differences in PrEP initiation or retention by client  
17 sex.<sup>16</sup> Client race varied substantially by setting, from 83.3% white<sup>21</sup> to 77% Black<sup>16</sup> to 47%  
18 Hispanic/Latino<sup>17</sup>. Insurance coverage varied, from 35%<sup>16</sup> to 80%<sup>21</sup> of PrEP clients.  
19  
20

21 One large case study from Seattle enrolled 695 clients on PrEP;<sup>20</sup> the remaining case studies  
22 reported smaller PrEP enrollments of between 50-200 clients. Across studies, among clients who  
23 were referred for PrEP or completed a PrEP screening visit, between 74%<sup>19,20</sup> and 96%<sup>17</sup> started  
24 PrEP or filled their prescription, often on the same day or within a week.  
25  
26

27 Follow-up rates varied. In one study, 43% (23/53) of clients who filled their prescription  
28 attended their initial clinical appointment within 6 weeks of obtaining PrEP<sup>16</sup>. The largest study  
29 reported a 25% drop-out rate and a mean duration of PrEP use of 302 days.<sup>20</sup>  
30  
31

32 Two studies reported on HIV seroconversions among clients: one reported no seroconversions  
33 among PrEP clients,<sup>22,23</sup> and the other reported no seroconversions among active clients but a  
34 seroconversion among a client who was lost to follow-up but then returned for PrEP and was  
35 diagnosed upon HIV testing at the return visit.<sup>20</sup> One study also reported HIV post-exposure  
36 prophylaxis (PEP), noting that six clients received PEP prior to initiation of PrEP.<sup>17</sup>  
37  
38  
39  
40  
41  
42  
43  
44  
45  
46  
47  
48  
49  
50  
51  
52  
53  
54  
55  
56  
57  
58  
59  
60

**Table 1. Description of articles included in the case study review**

| Study                                 | Location                           | Description                                                                                                                                                                                                                                                                                                                                                                                                                                                                                                                                                                                                                                                                            | Results                                                                                                                                                                                                                                                                                                                                                           |
|---------------------------------------|------------------------------------|----------------------------------------------------------------------------------------------------------------------------------------------------------------------------------------------------------------------------------------------------------------------------------------------------------------------------------------------------------------------------------------------------------------------------------------------------------------------------------------------------------------------------------------------------------------------------------------------------------------------------------------------------------------------------------------|-------------------------------------------------------------------------------------------------------------------------------------------------------------------------------------------------------------------------------------------------------------------------------------------------------------------------------------------------------------------|
| Ryan et al., 2018 <sup>22,23</sup>    | USA:<br>Albuquerque,<br>New Mexico | One of the first pharmacy-run HIV PrEP clinics in the USA was established in July 2015. The half-day weekly clinic generally sees 10-14 patients per week. Over 200 patients have been seen overall.                                                                                                                                                                                                                                                                                                                                                                                                                                                                                   | There were no HIV seroconversions among those who started PrEP. Of the first 136 clients, 2 tested HIV-positive at baseline and 127 were started on PrEP (TDF/FDC). One discontinued due to side effects. No significant elevation in serum creatinine was noted over time. Average adherence was <1 missed doses per month and a median compliance rate of 0.99. |
| Havens et al., 2019 <sup>21</sup>     | USA:<br>Omaha,<br>Nebraska         | Pharmacist-led PrEP (P-PrEP) allowed pharmacists to serve as PrEP providers through a collaborative practice agreement (CPA). Pharmacists received education on HIV risk assessment, testing, risk reduction counseling, and administration of PrEP. Eligible participants received a 90-day F/TDF prescription and had the option to continue PrEP care at the university-based HIV clinic or at 1 of 3 participating sites (community pharmacy, university-based primary care clinic, or community primary care clinic). Follow-up visits were every 3 months after PrEP initiation, and laboratory monitoring was performed, including screening for HIV, chlamydia, and gonorrhea. | 60 participants enrolled in the P-PrEP program and started F/TDF. The majority, 91.7% (55/60), were men, 83.3% (50/60) were white, 80% (48/60) were commercially insured, and 89.8% (54/60) had completed some college or higher. The mean age of participants was 34 years (range, 20–61 years), and 88.3% (53/60) identified as MSM.                            |
| Khosropour et al., 2020 <sup>16</sup> | USA:<br>Jackson,<br>Mississippi    | The pharmacist evaluated patients for medical contraindications to PrEP, but no baseline labs were obtained. The pharmacist provided a PrEP prescription and scheduled a clinical appointment for patients within 6 weeks, at which time they were evaluated by a clinician and completed baseline labs.                                                                                                                                                                                                                                                                                                                                                                               | The pharmacist evaluated 69 patients for PrEP; 57% were MSM, 77% were black, and 65% were uninsured. All patients received a PrEP prescription; 83% the same day and 97% within 5 days. 53 (77%) of 69 clients filled the prescription; 87% of whom filled it within 1 week. Only 23 (43%) of 53                                                                  |

|                                                                   |                                |                                                                                                                                                                                                                                                                                                                                                                                                                                                                                                                                                                       |                                                                                                                                                                                                                                                                                                |
|-------------------------------------------------------------------|--------------------------------|-----------------------------------------------------------------------------------------------------------------------------------------------------------------------------------------------------------------------------------------------------------------------------------------------------------------------------------------------------------------------------------------------------------------------------------------------------------------------------------------------------------------------------------------------------------------------|------------------------------------------------------------------------------------------------------------------------------------------------------------------------------------------------------------------------------------------------------------------------------------------------|
|                                                                   |                                |                                                                                                                                                                                                                                                                                                                                                                                                                                                                                                                                                                       | clients who filled their prescription attended their initial clinical appointment within 6 weeks. There were no differences in PrEP initiation or retention by patient sex/gender.                                                                                                             |
| Lopez et al., 2020 <sup>17</sup>                                  | USA: San Francisco, California | A community pharmacy and the Department of Public Health (DPH) developed a CPA that allowed community pharmacists to initiate PrEP and PEP. Pharmacists were trained by DPH staff members on HIV testing and counseling and implementation of the PrEP protocol, including PEP initiation and STI testing. A DPH physician reviewed patients' charts regularly and communicated with PrEP pharmacists as needed.                                                                                                                                                      | In the first year, 6 patients received PEP and 53 completed a PrEP initiation visit, of whom 96% (n = 51) filled their prescription. 47% (n=24) of clients who started PrEP self-identified as Hispanic or Latino, 10% (n=5) were black or African American, and 82% (n=42) identified as MSM. |
| Sawkin & Shah, 2016 (abstract) <sup>18</sup>                      | USA: Kansas City, Missouri     | Clinical pharmacists were trained to provide PrEP education and medication management outlined within a CPA. The screening visit includes rapid HIV testing, hepatitis C screening, urinalysis, pregnancy testing, complete blood count with differential, comprehensive metabolic profile, STI screening, and hepatitis B serology. Once deemed eligible, pharmacists prescribe TDF/FDC for up to 90 days to ensure medication safety and efficacy. Patients return every 3 months for labs including rapid HIV testing, a basic metabolic panel, and STD screening. | In the first year, the PrEP clinic had more than 50 actively managed patients.                                                                                                                                                                                                                 |
| Tung et al., 2017 (abstract) <sup>19</sup> and 2018 <sup>20</sup> | USA: Seattle, Washington state | The One-Step PrEP™ clinic, at a private pharmacy and under physician oversight (1 PGY1, 3 pharmacists, ancillary staff), provides PrEP with a single patient encounter. Pharmacists meet with patients individually, take a medical and sexual history, make a risk assessment, perform laboratory testing, provide patient education, and prescribe and dispense oral PrEP (TDF/FTC) when appropriate.                                                                                                                                                               | Of 714 patients evaluated, 695 (97.3%) initiated PrEP. Mean duration of PrEP use was 302 days. Same-day medication start: 513 (74%). Drop-out rate: 25%. STI diagnoses: 207 in 135 patients. HIV diagnoses: 2 at initial evaluation, 0 during active engagement, 1 after being LTFU.           |

## Values and Preferences Review

For the values and preferences review, 11 studies were identified, including one study that was also included in the case study review.<sup>21 24-29</sup> The majority (n=8) were conducted in the USA, but two were conducted in Kenya, and one was conducted in South Africa. Seven used quantitative methods, generally cross-sectional surveys, while four used qualitative methods, generally in-depth interviews.

Table 2 presents descriptive data for the values and preferences studies, stratified by end users (including potential PrEP candidates, current PrEP users, or general populations), or pharmacists, health workers and other professional stakeholders. Two studies included both potential end users and health workers. Table 3 presents findings from the values and preferences studies. Six studies from the USA, Kenya, and South Africa found potential PrEP clients generally supported PrEP prescriptions in pharmacies, though some preferred clinics. For example, a discrete choice experiment focused on long-acting PrEP options among youth in South Africa noted that location of PrEP access was relatively less important than other attributes such as dosing frequency, pain, or insertion site, but that different populations expressed different location preferences: women preferred health clinic access, men who have sex with women only preferred community locations, and MSM preferred pharmacy or health clinics.<sup>28</sup> One study of current PrEP pharmacy users found all would “definitely recommend” the program.<sup>21</sup> Six studies found pharmacists were generally supportive of offering PrEP,<sup>21 26 30-33</sup> one study including doctors found less support, and one study of diverse Kenyan stakeholders found broad support.<sup>33</sup> Benefits of pharmacy access included convenience, accessibility, and alignment with scope of work. Concerns included inadequate time, compensation for services, privacy, and training.

**Table 2. Descriptions of values and preferences studies**

| Study                                                  | Location                                                   | Population Description                 | Study design | Methods                                      | Sample size (n) |
|--------------------------------------------------------|------------------------------------------------------------|----------------------------------------|--------------|----------------------------------------------|-----------------|
| <b>End users</b>                                       |                                                            |                                        |              |                                              |                 |
| Begnel et al., 2020 <sup>24</sup>                      | Kenya: Homa Bay, Kisii, Kisumu, Migori, Nyamira, and Siaya | Adults aged 18+                        | Quantitative | Cross-sectional SMS survey                   | 2498            |
| Crawford et al., 2020 <sup>26</sup>                    | USA: Atlanta area, Georgia                                 | Adult MSM                              | Qualitative  | Semi-structured in-depth interviews          | 8               |
| Crawford et al., 2020 <sup>25</sup>                    | USA: Atlanta, Georgia                                      | HIV- MSM not using PrEP                | Quantitative | Cross-sectional survey                       | 259             |
| Havens et al., 2019 <sup>21</sup>                      | USA: Omaha, Nebraska                                       | PrEP users                             | Quantitative | Cross-sectional survey in case study project | 60              |
| Lutz et al., 2020 <sup>27</sup>                        | USA: Arizona                                               | HIV- PrEP clients and HIV+ ART clients | Quantitative | Cross-sectional survey                       | 49              |
| Minnis et al., 2020 <sup>28</sup>                      | South Africa: Nyanga and Masiphumelele, near Cape Town     | PrEP-eligible youth aged 18-24         | Quantitative | Discrete choice experiment                   | 807             |
| Zhu et al., 2020 <sup>29</sup>                         | USA: Washington, DC and Maryland                           | HIV- adults                            | Quantitative | Cross-sectional survey                       | 117             |
| <b>Pharmacists and other professional stakeholders</b> |                                                            |                                        |              |                                              |                 |



|                                        |                                      |                            |                                                                                                                         |              |                                              |     |
|----------------------------------------|--------------------------------------|----------------------------|-------------------------------------------------------------------------------------------------------------------------|--------------|----------------------------------------------|-----|
| 1<br>2<br>3<br>4<br>5<br>6<br>7<br>8   | Broekhuis et al., 2018 <sup>30</sup> | USA: Nebraska and Iowa     | Pharmacists                                                                                                             | Quantitative | Cross-sectional online survey                | 140 |
| 9                                      | Crawford et al., 2020 <sup>26</sup>  | USA: Atlanta area, Georgia | Pharmacists                                                                                                             | Qualitative  | Semi-structured in-depth interviews          | 6   |
| 10<br>11<br>12<br>13                   | Havens et al., 2019 <sup>21</sup>    | USA: Omaha, Nebraska       | Pharmacists                                                                                                             | Quantitative | Cross-sectional survey in case study project | 7   |
| 14<br>15<br>16<br>17<br>18<br>19       | Hopkins et al., 2020 <sup>31</sup>   | USA: Atlanta, Georgia      | Pharmacists and pharmacy technicians                                                                                    | Qualitative  | Semi-structured in-depth interviews          | 13  |
| 20<br>21<br>22<br>23<br>24             | Koester et al., 2020 <sup>32</sup>   | USA: California            | Pharmacists, physicians, pharmacy representatives                                                                       | Qualitative  | Semi-structured phone interviews             | 11  |
| 25<br>26<br>27<br>28<br>29<br>30<br>31 | Ortblad et al., 2020 <sup>33</sup>   | Kenya: Nairobi             | Stakeholders from PrEP regulatory, professional, healthcare service delivery, civil society, and research organizations | Qualitative  | Focus groups                                 | 36  |

MSM: men who have sex with men; ART: antiretroviral therapy

**Table 3. Key findings from values and preferences studies**

| Study                                                  | Location     | Results                                                                                                                                                                                                                                                                                                                                                                                                                                                                                                                                                                                                                    |
|--------------------------------------------------------|--------------|----------------------------------------------------------------------------------------------------------------------------------------------------------------------------------------------------------------------------------------------------------------------------------------------------------------------------------------------------------------------------------------------------------------------------------------------------------------------------------------------------------------------------------------------------------------------------------------------------------------------------|
| <b>End users</b>                                       |              |                                                                                                                                                                                                                                                                                                                                                                                                                                                                                                                                                                                                                            |
| Begnel et al., 2020 <sup>24</sup>                      | Kenya        | When asked whether someone would be most likely to obtain PrEP at a clinic, pharmacy, kiosk, or other location, 44% chose clinics, 37% chose pharmacies, 17% chose kiosks, and 1% chose other.                                                                                                                                                                                                                                                                                                                                                                                                                             |
| Crawford et al., 2020 <sup>25</sup>                    | USA          | Most participants (69%) were willing to discuss PrEP with pharmacy staff and 61.35% were willing to be screened for PrEP in pharmacy. There were no differences by race, after accounting for PrEP interest.                                                                                                                                                                                                                                                                                                                                                                                                               |
| Crawford et al., 2020 <sup>26</sup>                    | USA          | Most MSM supported in-pharmacy STI, HIV, and PrEP screenings and dissemination. Benefits included convenience and accessibility. Participants wanted to ensure privacy, confidentiality, and welcoming staff for MSM.                                                                                                                                                                                                                                                                                                                                                                                                      |
| Havens et al., 2019 <sup>21</sup>                      | USA          | At 6-month follow-up, all of the survey respondents stated they would definitely recommend the P-PrEP program.                                                                                                                                                                                                                                                                                                                                                                                                                                                                                                             |
| Lutz et al., 2020 <sup>27</sup>                        | USA          | 93.9% were comfortable seeing a pharmacist to discuss PrEP, and 93.9% were comfortable having a pharmacist test for HIV before starting PrEP. 83.7% were comfortable having a pharmacist prescribe PrEP, although only 4 participants (8.2%) strongly agreed.                                                                                                                                                                                                                                                                                                                                                              |
| Minnis et al., 2020 <sup>28</sup>                      | South Africa | In this discrete choice experiment about hypothetical long-acting PrEP options, "where PrEP is available" was relatively less important than other attributes such as dosing frequency, pain, or injection site. Females preferred using a product that was offered at a health clinic over accessing it at a pharmacy ( $p < 0.001$ ). Among males, men who have sex with women only had somewhat more preference for availability at a community location compared with a pharmacy and health clinic, whereas MSM held opposite views with pharmacy or health clinic preferred over a community location ( $p = 0.01$ ). |
| Zhu et al., 2020 <sup>29</sup>                         | USA          | Most participants supported pharmacists prescribing PrEP (Mean 4.0 (SD = 1.0), range 3.9 to 4.1 on a scale of 1-5 with 5 strongly agree). Most (58.1%) had no concerns; the most common concerns were "prefer to obtain a prescription from my doctor" (16.2%) and "privacy concerns" (15.4%). Participants were more likely to support pharmacy PrEP if they had previous interactions with pharmacists or if they had previously used PrEP (vs. non-users).                                                                                                                                                              |
| <b>Pharmacists and other professional stakeholders</b> |              |                                                                                                                                                                                                                                                                                                                                                                                                                                                                                                                                                                                                                            |
| Broekhuis et al., 2018 <sup>30</sup>                   | USA          | Respondents were "moderately concerned" or "very concerned" about the following issues: time burden (61%), inadequate compensation for services (55%), outside skill set (39%), patient adherence to therapy (63%), loss to follow-up (56%), and promotion of antiretroviral drug resistance (51%).                                                                                                                                                                                                                                                                                                                        |

|                                                    |                                     |       |                                                                                                                                                                                                                                                                                                                                                                                                                                                                                                                                                                                                                                                                                |
|----------------------------------------------------|-------------------------------------|-------|--------------------------------------------------------------------------------------------------------------------------------------------------------------------------------------------------------------------------------------------------------------------------------------------------------------------------------------------------------------------------------------------------------------------------------------------------------------------------------------------------------------------------------------------------------------------------------------------------------------------------------------------------------------------------------|
| 1<br>2<br>3<br>4<br>5                              | Crawford et al., 2020 <sup>26</sup> | USA   | Although STI, HIV, and PrEP services were not currently available, all pharmacists expressed considerable support for providing these services within their pharmacies.                                                                                                                                                                                                                                                                                                                                                                                                                                                                                                        |
| 6<br>7<br>8<br>9                                   | Havens et al., 2019 <sup>21</sup>   | USA   | The P-PrEP pharmacists felt comfortable performing point of care testing at all visits except on 1 occasion (0.7%, 1 of 139). 1 pharmacist at the community pharmacy site reported 3 occasions (2.2%) in which they felt uncomfortable conducting sexual histories during P-PrEP follow-up visits. Workflow disruption at the community pharmacy site was reported only once (0.7%) throughout the study.                                                                                                                                                                                                                                                                      |
| 10<br>11<br>12<br>13<br>14<br>15<br>16<br>17       | Hopkins et al., 2020 <sup>31</sup>  | USA   | Pharmacists and pharmacy technicians expressed strong willingness and support for screening and dispensing PrEP in pharmacies. Both groups expressed concerns about the time and the resources needed to perform PrEP screening and dispensing. Technicians also reported concerns about privacy for patients as well as the need for community support and awareness of pharmacy-based PrEP screening, and they recommended scheduling of PrEP screening activities during a limited part of the day to facilitate screening. Pharmacists reported fewer barriers but a need for more training of pharmacy staff to assist with PrEP screening and dispensing implementation. |
| 18<br>19<br>20<br>21<br>22<br>23<br>24             | Koester et al., 2020 <sup>32</sup>  | USA   | Participants felt benefits included accessibility (longer pharmacy hours and accessible staff and locations), access to refill data to counsel on adherence, and alignment with other medications already given by pharmacists. Barriers included questions about who would cover costs and potential lack of privacy and training. Medical providers were not entirely supportive of expanding the pharmacists' scope of practice to include PrEP due to concerns about training to handle potential complications or other health issues that might present.                                                                                                                 |
| 25<br>26<br>27<br>28<br>29<br>30<br>31<br>32<br>33 | Ortblad et al., 2020 <sup>33</sup>  | Kenya | Stakeholders were enthusiastic about a model for pharmacy-based PrEP delivery. Potential challenges identified included insufficient pharmacy provider knowledge and skills, regulatory hurdles to providing affordable HIV testing at pharmacies, and undefined pathways for PrEP procurement. Potential solutions included having pharmacy providers complete the Kenya Ministry of Health-approved PrEP training, use of a PrEP prescribing checklist with remote clinician oversight and provider-assisted HIV self-testing, and having the government provide PrEP and HIV self-testing kits to pharmacies during a pilot test.                                           |

## Cost review

Two of the case studies presented data about health sector costs and patient/family costs,<sup>19-21</sup> and one values and preferences article also examined willingness to pay for PrEP.<sup>24</sup> No studies looked at other sector costs or productivity impacts. Table 4 summarizes the three studies included in the costs review. Both case studies which presented cost data were conducted in the USA. For health sector costs, one clinic reported it recouped start-up costs in 9 months, and financial sustainability was dependent on the ability of pharmacists to bill insurance plans for their services.<sup>19 20</sup> For patient/family costs, 98% of patients paid US\$0 for their PrEP in one study, and in another, participants were split in willingness to pay US\$20 or US\$60 quarterly for PrEP visits.<sup>19 20</sup> Finally, one article from Kenya found over half of participants were willing to pay for PrEP and 78% said the maximum they would pay for a month's supply was <US\$5.<sup>24</sup>

**Table 4. Description of articles included in the cost review**

| Study                                                             | Location                       | Results                                                                                                                                                                                                                                                                                                                                                                                                                                                                 |
|-------------------------------------------------------------------|--------------------------------|-------------------------------------------------------------------------------------------------------------------------------------------------------------------------------------------------------------------------------------------------------------------------------------------------------------------------------------------------------------------------------------------------------------------------------------------------------------------------|
| Begnel et al., 2020 <sup>24</sup>                                 | Kenya                          | Over half (61%) of participants were willing to pay for PrEP and 78% reported that the maximum amount they were willing to pay for a one-month supply was <\$5.                                                                                                                                                                                                                                                                                                         |
| Havens et al., 2019 <sup>21</sup>                                 | USA: Omaha, Nebraska           | Among participants who completed follow-up visits at the community pharmacy, half (6 of 12) stated they would be willing to pay at least \$20 quarterly for continued PrEP visits and half (6 of 12) were willing to pay up to \$60 quarterly.                                                                                                                                                                                                                          |
| Tung et al., 2017 (abstract) <sup>19</sup> and 2018 <sup>20</sup> | USA: Seattle, Washington state | In the 2017 abstract, 96% of patients (235/245) paid \$0 for their PrEP. Initial startup costs were recouped after 9 months of operations. In the 2018 article, 98% of patients paid \$0 for their PrEP (total n=695). Financial sustainability of the model was dependent on the ability of pharmacists to bill insurance plans for their services in accordance with local legislative changes requiring commercial insurances to recognize pharmacists as providers. |

## Discussion

This systematic review identified no studies for our primary PICO questions, indicating a paucity of evidence investigating the comparative effectiveness of pharmacy- versus provider-access to PrEP, for individuals initiating or continuing PrEP. However, we did identify six non-comparative case studies which provide some limited evidence on the feasibility of pharmacy distribution of PrEP. Although all were from the USA, all found pharmacy-access PrEP to be a feasible service delivery model.

The evidence base identified in our review was largely focused on the USA, with just three values and preferences studies and one cost study from sub-Saharan African settings. This represents a critical gap in the literature given global differences in pharmacy regulation and capacity, particularly in many settings with high HIV prevalence. Pharmacies in the USA are subject to substantial regulations, and pharmacists generally receive high levels of training and

oversight, which may enable provision of high-quality services for PrEP through pharmacies. In other settings, training and regulation may be more variable, making quality control more challenging. Notably, most of the case studies specifically described using CPAs which require physician oversight of pharmacist provision of PrEP. Training may also vary significantly by type of health worker, as pharmacists (compared with nurses or physicians) typically receive more robust training in pharmacotherapy as well as monitoring for efficacy, toxicity and safety; the team-based approach to pharmacy distribution of PrEP may synergize the strengths of each type of health worker. Most of the study pharmacies either had laboratory capacity or were well-connected with laboratories, providing an avenue for baseline tests and ongoing monitoring needed for PrEP. Where links with laboratories do not exist, it will be important to consider how they might be created to ensure appropriate support for PrEP initiation and continuation.<sup>7</sup> In some settings, health systems have developed simplified laboratory testing for PrEP delivery, for example by waiving creatinine testing, or have allowed HIV self-testing for PrEP continuation. However, these models were found to be highly feasible with few adverse outcomes, warranting further research in a wider range of settings.

In terms of values and preferences, we found that actual or potential PrEP clients were generally supportive of pharmacy-access PrEP. Many included studies did not describe in-depth reasons for or against pharmacy PrEP. In the USA, MSM emphasized the importance of privacy, confidentiality, and having welcoming staff.<sup>21 26 29</sup> One study from South Africa highlighted the role of subgroup differences, finding that preferences for potential long-acting PrEP differed between women, MSM, and men who have sex with women.<sup>28</sup> These differences align with previous findings about user preferences for PrEP delivery more broadly.<sup>34 35</sup> Further, even within subpopulations (e.g. women), heterogeneity is to be expected as user preferences may be shaped by geographic, economic, and sociocultural contexts.<sup>36</sup>

In particular, we found that pharmacy delivery of PrEP was highly accepted among marginalized groups, such as Black MSM in the south of the USA.<sup>16 25 26</sup> As these groups face critical barriers to accessing PrEP through more traditional modalities, pharmacy PrEP may be an important additional option for them.<sup>37</sup> Understanding the perspectives of other groups often excluded from research on PrEP users' values and preferences, such as transgender people, sex workers, or people who use drugs, is also critical.<sup>34</sup>

Evidence from health workers indicated mixed support for pharmacy-access PrEP. Some had concerns about the added time associated with a new task, though one of our included case studies found that workflow disruption was minimal.<sup>21</sup> Concerns about insufficient training and skills to provide PrEP were common.<sup>30-33</sup> While guidelines and clinical requirements at PrEP visits vary across settings,<sup>38</sup> pharmacists require training and supervision to provide HIV and creatinine clearance testing at a minimum, along with pregnancy testing, STI screening, and other diagnostic tests depending on setting and population. Training may also be required regarding other aspects of integrated SRH, such as contraceptive provision or referral for people at risk of violence. For instance, lockdowns during the COVID-19 pandemic have limited access to health services, and task sharing to pharmacists can support a range of health interventions. The WHO Academy<sup>10</sup> module on counselling and prescribing of contraception in pharmacies has developed competency-based learning for pharmacists which could be further extended to other health areas, including provision of PrEP. Along with training and supervision, strategies to

1  
2  
3 support laboratory access – whether on-site or elsewhere – will be key to offering PrEP through  
4 pharmacies. This might require changes to supply chain systems to ensure uninterrupted supply  
5 of PrEP medications for pharmacies, as well as changes to health management information  
6 systems to ensure that pharmacy-level activities can be captured. Furthermore, monitoring of  
7 pharmacy-access PrEP would have to become part of routine monitoring efforts in order to help  
8 ensure quality service provision.  
9

10  
11 Two of our included studies assessed client willingness to pay for pharmacy-access PrEP.  
12 Willingness to pay ranged from US\$5 per month in Kenya<sup>24</sup> to as much as US\$20 per month in  
13 the USA<sup>21</sup>. In terms of overall financial sustainability of the PrEP pharmacy model, in the USA,  
14 one study found this was achievable but entirely dependent on insurance billing. Since costs and  
15 willingness to pay will vary substantially by income, setting, and health system or  
16 insurance/reimbursement structure, further research in this area is needed. Additional evidence  
17 could elucidate cost differences in countries where national health insurance programs partner  
18 with pharmacies, compared to those where government services are generally provided for free  
19 or at low-cost. Broadly, given the high HIV burden and rapid scale-up of PrEP in sub-Saharan  
20 Africa,<sup>39,40</sup> more costing data from this region is needed. For example, some African PrEP  
21 programs have adopted models wherein service delivery costs are shared across interventions  
22 through shared service platforms.<sup>41-43</sup> It may be that integrating PrEP into pharmacies offers  
23 similar opportunities for cost-sharing across programs and interventions;<sup>44</sup> this warrants further  
24 exploration.  
25  
26  
27

28  
29 While the studies included in our review all focused on daily oral PrEP except for one  
30 hypothetical values and preferences study on long-acting injectable PrEP, the monthly dapivirine  
31 vaginal ring is included in the WHO list of prequalified products and in recent WHO guidelines  
32<sup>45</sup> as an additional prevention choice for women. Its high safety profile and low systemic  
33 absorption reduce requirements for laboratory monitoring may make pharmacy delivery and  
34 option for established women users. Long-acting injectable PrEP (cabotegravir), which is given  
35 by intramuscular injection every 8 weeks, is likely to gain regulatory approval and could  
36 potentially be considered in the future for pharmacy provision, if complexities with HIV testing  
37 and other implementation issues are resolved. Long-acting injectable PrEP formulations have  
38 been viewed favorably by potential end-users.<sup>46</sup> Future studies should consider not only the  
39 safety and effectiveness of delivering long-acting PrEP products such as the dapivirine vaginal  
40 ring and long-acting injectable PrEP at pharmacies, but also end user and health worker  
41 preferences around this delivery option. These interventions might also be considered as part of a  
42 broader package of SRH-related services that could be managed to the pharmacy-level, which  
43 might help maximize efficiencies and minimize stigma associated with standalone HIV  
44 interventions.  
45  
46  
47

48  
49 Our review had several strengths and limitations. We conducted a comprehensive search for  
50 articles not only on effectiveness, but also on values and preferences of end users and health  
51 workers, as well as cost data. However, our focus on peer-reviewed articles and conference  
52 abstracts may have missed some relevant information from program reports or other grey  
53 literature. We missed the words "initiation", "initiate", and "initiated" in our search terms, but  
54 believe that most articles describing pharmacist initiation of PrEP would have used either  
55 "pharmacy" or "pharmacist" so would have been captured by our search. We also acknowledge  
56  
57  
58  
59

1  
2  
3 that this is a new and rapidly growing field; we may have excluded articles which would have  
4 met our inclusion criteria but were published after our search date, including at least one  
5 acceptability and feasibility study conducted among clients and health workers in Kenya which  
6 reinforced our findings of support for expanding PrEP to retail pharmacies, though participants  
7 wanted to ensure that such services would be “private, respectful, safe, and affordable”.<sup>47</sup> Our  
8 conclusions are also limited because nearly all the evidence identified in our review came from  
9 the USA, except for a few studies from Kenya and South Africa. Future research should continue  
10 to examine the potential for pharmacy provision of PrEP in resource-limited settings.  
11  
12

### 13 **Conclusions**

14  
15  
16 Overall, we found that while pharmacy distribution of PrEP has been shown to be feasible in  
17 some studies in the USA and valued by end users in small studies, there is a lack of evidence  
18 around its effectiveness or its adaptability to low- and middle-income settings. As PrEP services  
19 continue to expand worldwide, additional research and programmatic efforts into pharmacy  
20 delivery are warranted. The services, staffing, infrastructure, and regulation of pharmacies varies  
21 considerably between and within countries; if PrEP products are to be delivered through these  
22 settings, minimum service requirements and staff training needs will need to be considered. With  
23 the increasing roll-out of PrEP across regions, more evidence from safety monitoring may reduce  
24 laboratory monitoring requirements, and the COVID-19 pandemic has led to adaptations to  
25 support continuation of PrEP delivery such as the use of HIV self-testing, virtual platforms, and  
26 telemedicine support. Future implementation research could explore how these could be  
27 incorporated into future PrEP pharmacy models. This evidence base should be informed by  
28 variation across contexts, screening and laboratory requirements, and values and preferences of  
29 affected populations and health workers. Privacy, confidentiality, and quality of services will be  
30 important to ensure for all clients. Overall, pharmacy access may be a promising strategy for  
31 expanding access to PrEP, improving equity, and helping to respect, protect and fulfil the right to  
32 health.  
33  
34  
35

36  
37 **Acknowledgements:** We thank Johns Hopkins graduate students Hunied Kautsar, Jingjia  
38 (Cynthia) Li, and Xuhao Yang for their help screening citations and coding articles for this  
39 review. We also thank Shona Dalal, Robin Schaefer, Michelle Rodolph, and Nandi Siegfried for  
40 their thoughtful comments on the protocol and/or draft manuscript.  
41

42  
43 **Contributions:** MN conceptualized the study, following discussion with RB. CK and PTY  
44 designed the protocol, with feedback from MN, RB, and LF. PTY ran the database search and  
45 oversaw the search, screening, full text review, and data extraction process. CK and KA drafted  
46 the manuscript. All authors reviewed the draft, provided critical review, and read and approved  
47 the final manuscript. The corresponding author, as guarantor, accepts full responsibility for the  
48 finished article has access to any data and controlled the decision to publish. The corresponding  
49 author attests that all listed authors meet the authorship criteria and that no others meeting the  
50 criteria have been omitted.  
51

52  
53 The named authors alone are responsible for the views expressed in this publication and do not  
54 necessarily represent the decisions or the policies of the World Health Organization (WHO) or  
55  
56  
57  
58  
59

1  
2  
3 the UNDP-UNFPA-UNICEF-WHO-World Bank Special Programme of Research, Development  
4 and Research Training in Human Reproduction (HRP).  
5

6 **Financial support:** We gratefully acknowledge financial support of The Children's Investment  
7 Fund Foundation (CIFF). The funder played no part in the decision to submit the article for  
8 publication, nor in the collection, analysis and interpretation of data. All authors had full access  
9 to all of the data in the study and can take responsibility for the integrity of the data and the  
10 accuracy of the data analysis.  
11  
12

13 **Competing interests:** None declared.  
14

15 **Patient consent for publication:** Not required.  
16

17 **Provenance and peer review:** Not commissioned; externally peer reviewed.  
18

19 **Ethics statement:** Ethical approval was not required for this systematic review, since all data  
20 came from published articles.  
21  
22

23 **Data availability statement:** Extracted data are available on request to the corresponding  
24 author.  
25  
26

27 **Transparency declaration:** The corresponding author, as guarantor, affirms that the manuscript  
28 is an honest, accurate, and transparent account of the study being reported; that no important  
29 aspects of the study have been omitted; and that any discrepancies from the study as planned  
30 (and, if relevant, registered) have been explained.  
31  
32  
33  
34  
35  
36  
37  
38  
39  
40  
41  
42  
43  
44  
45  
46  
47  
48  
49  
50  
51  
52  
53  
54  
55  
56  
57  
58  
59  
60



## References

1. WHO. Guidelines: updated recommendations on HIV prevention, infant diagnosis, antiretroviral initiation and monitoring. Geneva: World Health Organization 2021.
2. WHO. Preventing HIV and other STIs among women and girls using contraceptive services in contexts with high HIV incidence: actions for improved clinical and prevention services and choices 2020 [Available from: <https://www.who.int/publications/i/item/actions-for-improved-clinical-and-prevention-services-and-choices-preventing-hiv-and-other-stis-among-women-and-girls-using-contraceptive-services>].
3. Mayer KH, Chan PA, R RP, et al. Evolving Models and Ongoing Challenges for HIV Preexposure Prophylaxis Implementation in the United States. *Journal of acquired immune deficiency syndromes (1999)* 2018;77(2):119-27. doi: 10.1097/qai.0000000000001579 [published Online First: 2017/10/31]
4. Farley JE, Dangerfield DT, 2nd, LaRicci J, et al. Community engagement and linkage to care efforts by peer community-health workers to increase PrEP uptake among sexual minority men. *Public Health Nurs* 2021 doi: 10.1111/phn.12887
5. Touger R, Wood BR. A Review of Telehealth Innovations for HIV Pre-Exposure Prophylaxis (PrEP). *Current HIV/AIDS reports* 2019;16(1):113-19. doi: 10.1007/s11904-019-00430-z
6. Myers JE, Farhat D, Guzman A, et al. Pharmacists in HIV Prevention: An Untapped Potential. *American Journal of Public Health* 2019;109(6):859-61. doi: 10.2105/AJPH.2019.305057
7. Lopez MI, Grant RM, Dong BJ. Community pharmacy delivered PrEP to STOP HIV transmission: An opportunity NOT to miss! *Journal of the American Pharmacists Association : JAPhA* 2020;60(4):e18-e24. doi: 10.1016/j.japh.2020.01.026
8. Farmer EK, Koren DE, Cha A, et al. The Pharmacist's Expanding Role in HIV Pre-Exposure Prophylaxis. *AIDS patient care and STDs* 2019;33(5):207-13. doi: 10.1089/apc.2018.0294
9. WHO. WHO consolidated guideline on self-care interventions for health: sexual and reproductive health and rights. Geneva, Switzerland: World Health Organization, 2019. Available from: <https://www.who.int/reproductivehealth/publications/self-care-interventions/en/>.
10. WHO. WHO Academy 2021 [Available from: <https://www.who.int/about/who-academy>].
11. WHO. Maintaining essential health services: operational guidance for the COVID-19 context interim guidance. Geneva, Switzerland: World Health Organization, 2020. Available from: <https://www.who.int/publications/i/item/WHO-2019-nCoV-essential-health-services-2020.1>.
12. WHO. Maintaining essential health services: operational guidance for the COVID-19 context interim guidance 2020 [Available from: <https://www.who.int/publications/i/item/WHO-2019-nCoV-essential-health-services-2020.1>].
13. Moher D, Liberati A, Tetzlaff J, et al. Preferred reporting items for systematic reviews and meta-analyses: the PRISMA statement. *PLoS medicine* 2009;6(7):e1000097. doi: 10.1371/journal.pmed.1000097 [published Online First: 2009/07/22]
14. Cochrane Handbook for Systematic Reviews of Interventions. In: Higgins JPT, Thomas J, Chandler J, et al., eds., 2019.

15. Kennedy CE, Fonner VA, Armstrong KA, et al. The Evidence Project risk of bias tool: assessing study rigor for both randomized and non-randomized intervention studies. *Systematic Reviews* 2019;8(1):3. doi: 10.1186/s13643-018-0925-0
16. Khosropour CM, Backus KV, Means AR, et al. A Pharmacist-Led, Same-Day, HIV Pre-Exposure Prophylaxis Initiation Program to Increase PrEP Uptake and Decrease Time to PrEP Initiation. *AIDS patient care and STDs* 2020;34(1):1-6. doi: 10.1089/apc.2019.0235
17. Lopez MI, Cocohoba J, Cohen SE, et al. Implementation of pre-exposure prophylaxis at a community pharmacy through a collaborative practice agreement with San Francisco Department of Public Health. *Journal of the American Pharmacists Association : JAPhA* 2020;60(1):138-44. doi: 10.1016/j.japh.2019.06.021
18. Sawkin M, Shah M. Development of a pharmacist-led human immunodeficiency virus pre-exposure prophylaxis clinic at an urban community clinic. *Journal of the American Pharmacists Association* 2016;56(3):e48. doi: 10.1016/j.japh.2016.03.014
19. Tung E, Thomas A, Eichner A, et al. Feasibility of a pharmacist-run HIV PrEP clinic in a community pharmacy setting. *Topics in Antiviral Medicine* 2017;25(1):407s.
20. Tung EL, Thomas A, Eichner A, et al. Implementation of a community pharmacy-based pre-exposure prophylaxis service: a novel model for pre-exposure prophylaxis care. *Sexual health* 2018;15(6):556-61. doi: 10.1071/sh18084
21. Havens JP, Scarsi KK, Sayles H, et al. Acceptability and feasibility of a pharmacist-led HIV pre-exposure prophylaxis (PrEP) program in the Midwestern United States. *Open forum infectious diseases* 2019;6(10) doi: 10.1093/ofid/ofz365
22. Ryan K, Lewis J, Sanchez D, et al. The next step in prep: Evaluating outcomes of a pharmacist-run HIV pre-exposure prophylaxis (PREP) clinic. *Open forum infectious diseases* 2018;5:S395. doi: 10.1093/ofid/ofy210.1126
23. Ryan KL, Jakeman B, Conklin J, et al. Treatment of patients with HIV or hepatitis C by pharmacist clinicians in a patient-centered medical home. *American Journal of Health-System Pharmacy* 2019;76(11):821-28. doi: 10.1093/ajhp/zxz059
24. Begnel ER, Escudero J, Mugambi M, et al. High pre-exposure prophylaxis awareness and willingness to pay for pre-exposure prophylaxis among young adults in Western Kenya: results from a population-based survey. *International journal of STD & AIDS* 2020;31(5):454-59. doi: 10.1177/0956462420912141
25. Crawford ND, Albarran T, Chamberlain A, et al. Willingness to Discuss and Screen for Pre-Exposure Prophylaxis in Pharmacies Among Men Who Have Sex With Men. *Journal of pharmacy practice* 2020:897190020904590. doi: 10.1177/0897190020904590
26. Crawford ND, Josma D, Morris J, et al. Pharmacy-based pre-exposure prophylaxis support among pharmacists and men who have sex with men. *Journal of the American Pharmacists Association : JAPhA* 2020;60(4):602-08. doi: 10.1016/j.japh.2019.12.003
27. Lutz S, Heberling M, Goodlet KJ. Patient perspectives of pharmacists prescribing HIV pre-exposure prophylaxis: A survey of patients receiving antiretroviral therapy. *Journal of the American Pharmacists Association : JAPhA* 2020 doi: 10.1016/j.japh.2020.09.020 [published Online First: 2020/10/19]
28. Minnis AM, Atujuna M, Browne EN, et al. Preferences for long-acting Pre-Exposure Prophylaxis (PrEP) for HIV prevention among South African youth: results of a discrete choice experiment. *Journal of the International AIDS Society* 2020;23(6):e25528. doi: 10.1002/jia2.25528

29. Zhu V, Tran D, Banjo O, et al. Patient perception of community pharmacists prescribing pre-exposure prophylaxis for HIV prevention. *Journal of the American Pharmacists Association : JAPhA* 2020;60(6):781-81. doi: 10.1016/j.japh.2020.03.013
30. Broekhuis JM, Scarsi KK, Sayles HR, et al. Midwest pharmacists' familiarity, experience, and willingness to provide pre-exposure prophylaxis (PrEP) for HIV. *PloS one* 2018;13(11):e0207372. doi: 10.1371/journal.pone.0207372
31. Hopkins R, Josma D, Morris J, et al. Support and perceived barriers to implementing pre-exposure prophylaxis screening and dispensing in pharmacies: Examining concordance between pharmacy technicians and pharmacists. *Journal of the American Pharmacists Association : JAPhA* 2020 doi: 10.1016/j.japh.2020.10.005 [published Online First: 2020/11/21]
32. Koester KA, Saberi P, Fuller SM, et al. Attitudes about community pharmacy access to HIV prevention medications in California. *Journal of the American Pharmacists Association : JAPhA* 2020:e179-e83. doi: 10.1016/j.japh.2020.06.005
33. Ortblad KF, Mogere P, Roche S, et al. Design of a care pathway for pharmacy-based PrEP delivery in Kenya: results from a collaborative stakeholder consultation. *BMC health services research* 2020;20(1):1034. doi: 10.1186/s12913-020-05898-9 [published Online First: 2020/11/13]
34. Eakle R, Weatherburn P, Bourne A. Understanding user perspectives of and preferences for oral PrEP for HIV prevention in the context of intervention scale-up: a synthesis of evidence from sub-Saharan Africa. *Journal of the International AIDS Society* 2019;22 Suppl 4(Suppl Suppl 4):e25306. doi: 10.1002/jia2.25306 [published Online First: 2019/07/23]
35. Koechlin FM, Fonner VA, Dalglish SL, et al. Values and Preferences on the Use of Oral Pre-exposure Prophylaxis (PrEP) for HIV Prevention Among Multiple Populations: A Systematic Review of the Literature. *AIDS and behavior* 2017;21(5):1325-35. doi: 10.1007/s10461-016-1627-z [published Online First: 2016/12/03]
36. Minnis AM, Browne EN, Boeri M, et al. Young Women's Stated Preferences for Biomedical HIV Prevention: Results of a Discrete Choice Experiment in Kenya and South Africa. *Journal of acquired immune deficiency syndromes (1999)* 2019;80(4):394-403. doi: 10.1097/qai.0000000000001945 [published Online First: 2019/01/12]
37. Edeza A, Karina Santamaria E, Valente PK, et al. Experienced barriers to adherence to pre-exposure prophylaxis for HIV prevention among MSM: a systematic review and meta-ethnography of qualitative studies. *AIDS care* 2020:1-9. doi: 10.1080/09540121.2020.1778628
38. WHO. Guideline on when to start antiretroviral therapy and on pre-exposure prophylaxis for HIV. Geneva, Switzerland: World Health Organization, 2015. Available from: <https://www.who.int/hiv/pub/guidelines/earlyrelease-arv/en/>.
39. Ahmed N, Pike C, Bekker LG. Scaling up pre-exposure prophylaxis in sub-Saharan Africa. *Current opinion in infectious diseases* 2019;32(1):24-30. doi: 10.1097/qco.0000000000000511 [published Online First: 2018/11/22]
40. Irungu EM, Baeten JM. PrEP rollout in Africa: status and opportunity. *Nature medicine* 2020;26(5):655-64. doi: 10.1038/s41591-020-0872-x [published Online First: 2020/05/15]
41. South Africa National Department of Health. Guidelines for the Provision of Pre-exposure Prophylaxis (PrEP) to Persons at Substantial Risk of HIV Infection. 2020

- 1  
2  
3  
4  
5  
6  
7  
8  
9  
10  
11  
12  
13  
14  
15  
16  
17  
18  
19  
20  
21  
22  
23  
24  
25  
26  
27  
28  
29  
30  
31  
32  
33  
34  
35  
36  
37  
38  
39  
40  
41  
42  
43  
44  
45  
46  
47  
48  
49  
50  
51  
52  
53  
54  
55  
56  
57  
58  
59  
60
42. National AIDS & STI Control Program. Framework for the Implementation of Pre-Exposure Prophylaxis of HIV In Kenya. Kenya Ministry of Health,, 2017. Available from: <https://prep.nascop.org/policies-and-guidelines/>
  43. Zimbabwe Ministry of Health and Child Care. Implementation Plan for HIV Pre-Exposure Prophylaxis in Zimbabwe. 2017. Available from: [http://www.mohcc.gov.zw/index.php?option=com\\_content&view=article&id=189&Itemid=732](http://www.mohcc.gov.zw/index.php?option=com_content&view=article&id=189&Itemid=732).
  44. Roberts DA, Barnabas RV, Abuna F, et al. The role of costing in the introduction and scale-up of HIV pre-exposure prophylaxis: evidence from integrating PrEP into routine maternal and child health and family planning clinics in western Kenya. *Journal of the International AIDS Society* 2019;22 Suppl 4(Suppl Suppl 4):e25296. doi: 10.1002/jia2.25296 [published Online First: 2019/07/23]
  45. WHO. Updated recommendations on HIV prevention, infant diagnosis, antiretroviral initiation and monitoring. 2021
  46. Clement ME, Kofron R, Landovitz RJ. Long-acting injectable cabotegravir for the prevention of HIV infection. *Curr Opin HIV AIDS* 2020;15(1):19-26. doi: 10.1097/COH.0000000000000597
  47. Roche SD, Wairimu N, Mogere P, et al. Acceptability and Feasibility of Pharmacy-Based Delivery of Pre-Exposure Prophylaxis in Kenya: A Qualitative Study of Client and Provider Perspectives. *AIDS and behavior* 2021 doi: 10.1007/s10461-021-03229-5 [published Online First: 2021/04/08]

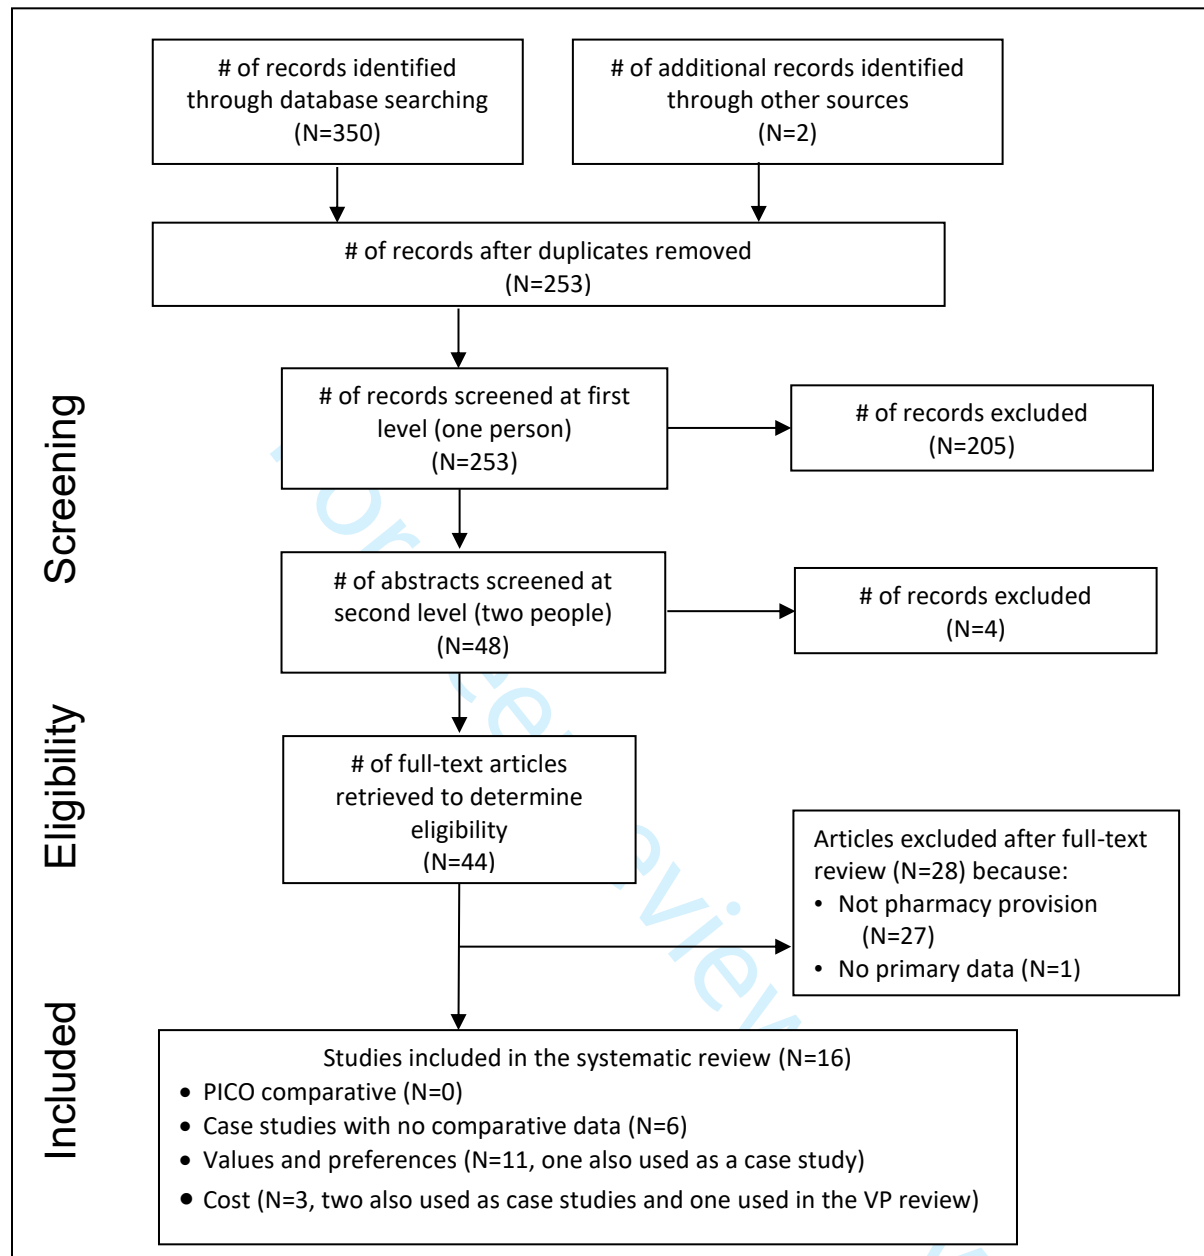

## PrEP distribution in pharmacies: a systematic review

### Appendix A. Search strategy

#### Pubmed

("Pre-Exposure Prophylaxis" [Mesh] OR "pre-exposure prophylaxis" [tiab] OR "preexposure prophylaxis" [tiab] OR "antiretroviral prophylaxis" [tiab] OR "preexposure chemoprophylaxis" [tiab] OR PrEP [tiab]) AND ("Nonprescription Drugs" [Mesh] OR nonprescription [tiab] OR "over the counter" [tiab] OR "over-the-counter" [tiab] OR "without a prescription" [tiab] OR "pharmacist-prescribed" [tiab] OR "pharmacy access" [tiab] OR "clinician-prescribed" [tiab] OR "physician-prescribed" [tiab] OR "GP-prescribed" [tiab] OR "general practitioner prescribed" [tiab] OR "without prescription" [tiab] OR "community pharmacy services" [Mesh] OR pharmacy [tiab] OR pharmacist [tiab]) AND (HIV)

#### CINAHL

AB ("Pre-Exposure Prophylaxis" OR "preexposure prophylaxis" OR "antiretroviral prophylaxis" OR "preexposure chemoprophylaxis" OR PrEP) AND AB ("Nonprescription Drugs" OR nonprescription OR "over the counter" OR "over-the-counter" OR "without a prescription" OR "pharmacist-prescribed" OR "pharmacy access" OR "GP-prescribed" OR "general practitioner prescribed" OR "without prescription" OR "community pharmacy services" OR "pharmacy" OR "pharmacist") AND AB (HIV)

#### LILACS

Title/abstract/subject: ("Pre-Exposure Prophylaxis" OR "preexposure prophylaxis" OR "antiretroviral prophylaxis" OR "preexposure chemoprophylaxis" OR PrEP)

#### EMBASE

AB, TI, KW ('Pre-Exposure Prophylaxis' OR 'preexposure prophylaxis' OR 'antiretroviral prophylaxis' OR 'preexposure chemoprophylaxis' OR PrEP) AND AB, TI, KW ('Nonprescription Drugs' OR nonprescription OR 'over the counter' OR 'over-the-counter' OR 'without a prescription' OR 'pharmacist-prescribed' OR 'pharmacy access' OR 'GP-prescribed' OR 'general practitioner prescribed' OR 'without prescription' OR 'community pharmacy services' OR 'pharmacy' OR 'pharmacist') AND AB, TI, KW (HIV)

#### Clinicaltrials

<https://clinicaltrials.gov/>

1/15/2021

"PrEP" AND "Pharmacy"

"PrEP" AND "over the counter"

"Pre-Exposure Prophylaxis" AND "over the counter"

"Pre-Exposure Prophylaxis" AND "pharmacy"

#### WHO ICTRP

<https://apps.who.int/trialsearch/>

1/15/2021

Pre exposure prophylaxis AND HIV

**PACTR**<http://www.pactr.org/>

1/15/2021

pre exposure prophylaxis

PrEP

**ANZCTR**<https://www.anzctr.org.au/>

1/15/2021

pre exposure prophylaxis

PrEP

**Cochrane Library**<https://www.cochranelibrary.com/search>

1/15/2021

Pre exposure prophylaxis AND HIV

PrEP

PrEP AND Over-the-counter

PrEP AND Pharmacy

**AIDS, 2020**[https://www.aids2020.org/wp-content/uploads/2020/09/AIDS2020\\_Abstracts.pdf](https://www.aids2020.org/wp-content/uploads/2020/09/AIDS2020_Abstracts.pdf)

1/15/2021

PrEP

Pharmacy

over the counter

otc

**AIDS, 2018**[http://www.aids2018.org/Portals/4/File/AIDS2018\\_Abstract\\_book.pdf?ver=2018-08-06-160624-427](http://www.aids2018.org/Portals/4/File/AIDS2018_Abstract_book.pdf?ver=2018-08-06-160624-427)

1/15/2021

PrEP

Pharmacy

over the counter

otc

**AIDS, 2016**[https://www.aids2016.org/Portals/0/File/AIDS2016\\_Abstracts\\_LOW.pdf?ver=2016-08-10-154247-087](https://www.aids2016.org/Portals/0/File/AIDS2016_Abstracts_LOW.pdf?ver=2016-08-10-154247-087)

1/15/2021

PrEP

Pharmacy

over the counter

otc

**IAS, 2019**

<http://programme.ias2019.org/Abstract>

1/19/2021

PrEP

Pharmacy

over the counter

otc

**IAS, 2017**

[http://www.ias2017.org/Portals/1/Files/IAS2017\\_LO.compressed.pdf?ver=2017-07-27-211231-197](http://www.ias2017.org/Portals/1/Files/IAS2017_LO.compressed.pdf?ver=2017-07-27-211231-197)

1/19/2021

PrEP

Pharmacy

over the counter

otc

**IAS, 2015**

<http://pag.ias2015.org/Abstract/Index>

1/19/2021

PrEP

Pharmacy

over the counter

otc

**CROI**

<https://www.croiconference.org/search-abstracts/>

1/19/2021

PrEP

Pharmacy

over the counter

otc

**HIVR4P, 2018**

<https://www.liebertpub.com/doi/full/10.1089/aid.2018.5000.abstracts>

1/19/2021

PrEP

Pharmacy

over the counter

otc

**HIVR4P, 2016**

<https://www.liebertpub.com/doi/full/10.1089/aid.2016.5000.abstracts>

1/19/2021

PrEP



1  
2  
3  
4  
5  
6  
7  
8  
9  
10  
11  
12  
13  
14  
15  
16  
17  
18  
19  
20  
21  
22  
23  
24  
25  
26  
27  
28  
29  
30  
31  
32  
33  
34  
35  
36  
37  
38  
39  
40  
41  
42  
43  
44  
45  
46  
47  
48  
49  
50  
51  
52  
53  
54  
55  
56  
57  
58  
59  
60

Pharmacy  
over the counter  
otc

For peer review only



# PRISMA 2009 Checklist

| Section/topic                      | #  | Checklist item                                                                                                                                                                                                                                                                                              | Reported on page # |
|------------------------------------|----|-------------------------------------------------------------------------------------------------------------------------------------------------------------------------------------------------------------------------------------------------------------------------------------------------------------|--------------------|
| <b>TITLE</b>                       |    |                                                                                                                                                                                                                                                                                                             |                    |
| Title                              | 1  | Identify the report as a systematic review, meta-analysis, or both.                                                                                                                                                                                                                                         | 1                  |
| <b>ABSTRACT</b>                    |    |                                                                                                                                                                                                                                                                                                             |                    |
| Structured summary                 | 2  | Provide a structured summary including, as applicable: background; objectives; data sources; study eligibility criteria, participants, and interventions; study appraisal and synthesis methods; results; limitations; conclusions and implications of key findings; systematic review registration number. | 2                  |
| <b>INTRODUCTION</b>                |    |                                                                                                                                                                                                                                                                                                             |                    |
| Rationale                          | 3  | Describe the rationale for the review in the context of what is already known.                                                                                                                                                                                                                              | 4                  |
| Objectives                         | 4  | Provide an explicit statement of questions being addressed with reference to participants, interventions, comparisons, outcomes, and study design (PICOS).                                                                                                                                                  | 4-6                |
| <b>METHODS</b>                     |    |                                                                                                                                                                                                                                                                                                             |                    |
| Protocol and registration          | 5  | Indicate if a review protocol exists, if and where it can be accessed (e.g., Web address), and, if available, provide registration information including registration number.                                                                                                                               | 5                  |
| Eligibility criteria               | 6  | Specify study characteristics (e.g., PICOS, length of follow-up) and report characteristics (e.g., years considered, language, publication status) used as criteria for eligibility, giving rationale.                                                                                                      | 4-6                |
| Information sources                | 7  | Describe all information sources (e.g., databases with dates of coverage, contact with study authors to identify additional studies) in the search and date last searched.                                                                                                                                  | 6                  |
| Search                             | 8  | Present full electronic search strategy for at least one database, including any limits used, such that it could be repeated.                                                                                                                                                                               | 6-7                |
| Study selection                    | 9  | State the process for selecting studies (i.e., screening, eligibility, included in systematic review, and, if applicable, included in the meta-analysis).                                                                                                                                                   | 7                  |
| Data collection process            | 10 | Describe method of data extraction from reports (e.g., piloted forms, independently, in duplicate) and any processes for obtaining and confirming data from investigators.                                                                                                                                  | 7                  |
| Data items                         | 11 | List and define all variables for which data were sought (e.g., PICOS, funding sources) and any assumptions and simplifications made.                                                                                                                                                                       | 7                  |
| Risk of bias in individual studies | 12 | Describe methods used for assessing risk of bias of individual studies (including specification of whether this was done at the study or outcome level), and how this information is to be used in any data synthesis.                                                                                      | 7                  |
| Summary measures                   | 13 | State the principal summary measures (e.g., risk ratio, difference in means).                                                                                                                                                                                                                               | 7                  |
| Synthesis of results               | 14 | Describe the methods of handling data and combining results of studies, if done, including measures of consistency (e.g., $I^2$ ) for each meta-analysis.                                                                                                                                                   | NA                 |



# PRISMA 2009 Checklist

Page 1 of 2

| Section/topic                 | #  | Checklist item                                                                                                                                                                                           | Reported on page # |
|-------------------------------|----|----------------------------------------------------------------------------------------------------------------------------------------------------------------------------------------------------------|--------------------|
| Risk of bias across studies   | 15 | Specify any assessment of risk of bias that may affect the cumulative evidence (e.g., publication bias, selective reporting within studies).                                                             | NA                 |
| Additional analyses           | 16 | Describe methods of additional analyses (e.g., sensitivity or subgroup analyses, meta-regression), if done, indicating which were pre-specified.                                                         | 8                  |
| <b>RESULTS</b>                |    |                                                                                                                                                                                                          |                    |
| Study selection               | 17 | Give numbers of studies screened, assessed for eligibility, and included in the review, with reasons for exclusions at each stage, ideally with a flow diagram.                                          | 9                  |
| Study characteristics         | 18 | For each study, present characteristics for which data were extracted (e.g., study size, PICOS, follow-up period) and provide the citations.                                                             | 9-13               |
| Risk of bias within studies   | 19 | Present data on risk of bias of each study and, if available, any outcome level assessment (see item 12).                                                                                                | 9-13               |
| Results of individual studies | 20 | For all outcomes considered (benefits or harms), present, for each study: (a) simple summary data for each intervention group (b) effect estimates and confidence intervals, ideally with a forest plot. | 9-13               |
| Synthesis of results          | 21 | Present results of each meta-analysis done, including confidence intervals and measures of consistency.                                                                                                  | NA                 |
| Risk of bias across studies   | 22 | Present results of any assessment of risk of bias across studies (see Item 15).                                                                                                                          | NA                 |
| Additional analysis           | 23 | Give results of additional analyses, if done (e.g., sensitivity or subgroup analyses, meta-regression [see Item 16]).                                                                                    | NA                 |
| <b>DISCUSSION</b>             |    |                                                                                                                                                                                                          |                    |
| Summary of evidence           | 24 | Summarize the main findings including the strength of evidence for each main outcome; consider their relevance to key groups (e.g., healthcare providers, users, and policy makers).                     | 19-21              |
| Limitations                   | 25 | Discuss limitations at study and outcome level (e.g., risk of bias), and at review-level (e.g., incomplete retrieval of identified research, reporting bias).                                            | 21                 |
| Conclusions                   | 26 | Provide a general interpretation of the results in the context of other evidence, and implications for future research.                                                                                  | 21-22              |
| <b>FUNDING</b>                |    |                                                                                                                                                                                                          |                    |
| Funding                       | 27 | Describe sources of funding for the systematic review and other support (e.g., supply of data); role of funders for the systematic review.                                                               | 22                 |

From: Moher D, Liberati A, Tetzlaff J, Altman DG, The PRISMA Group (2009). Preferred Reporting Items for Systematic Reviews and Meta-Analyses: The PRISMA Statement. PLoS Med 6(7): e1000097. doi:10.1371/journal.pmed1000097

For more information, visit: [www.prisma-statement.org](http://www.prisma-statement.org).

Page 2 of 2

For peer review only - <http://bmjopen.bmj.com/site/about/guidelines.xhtml>
