# Supplementary material for: PrEP distribution in pharmacies: a systematic review
Source: PubMed Central journal article supplement — BMJ Open. 2022 Feb 18;12(2):e054121. doi: 10.1136/bmjopen-2021-054121 (PMC8860049; doi:10.1136/bmjopen-2021-054121), 2022-02-18
Supplement: bmjopen-2021-054121supp001.pdf [file bmjopen-2021-054121supp001.pdf]

**PrEP distribution in pharmacies: a systematic review****Appendix A. Search strategy****Pubmed**

("Pre-Exposure Prophylaxis" [Mesh] OR "pre-exposure prophylaxis" [tiab] OR "preexposure prophylaxis" [tiab] OR "antiretroviral prophylaxis" [tiab] OR "preexposure chemoprophylaxis" [tiab] OR PrEP [tiab]) AND ("Nonprescription Drugs" [Mesh] OR nonprescription [tiab] OR "over the counter" [tiab] OR "over-the-counter" [tiab] OR "without a prescription" [tiab] OR "pharmacist-prescribed" [tiab] OR "pharmacy access" [tiab] OR "clinician-prescribed" [tiab] OR "physician-prescribed" [tiab] OR "GP-prescribed" [tiab] OR "general practitioner prescribed" [tiab] OR "without prescription" [tiab] OR "community pharmacy services" [Mesh] OR pharmacy [tiab] OR pharmacist [tiab]) AND (HIV)

**CINAHL**

AB ("Pre-Exposure Prophylaxis" OR "preexposure prophylaxis" OR "antiretroviral prophylaxis" OR "preexposure chemoprophylaxis" OR PrEP) AND AB ("Nonprescription Drugs" OR nonprescription OR "over the counter" OR "over-the-counter" OR "without a prescription" OR "pharmacist-prescribed" OR "pharmacy access" OR "GP-prescribed" OR "general practitioner prescribed" OR "without prescription" OR "community pharmacy services" OR "pharmacy" OR "pharmacist") AND AB (HIV)

**LILACS**

Title/abstract/subject: ("Pre-Exposure Prophylaxis" OR "preexposure prophylaxis" OR "antiretroviral prophylaxis" OR "preexposure chemoprophylaxis" OR PrEP)

**EMBASE**

AB, TI, KW ('Pre-Exposure Prophylaxis' OR 'preexposure prophylaxis' OR 'antiretroviral prophylaxis' OR 'preexposure chemoprophylaxis' OR PrEP) AND AB, TI, KW ('Nonprescription Drugs' OR nonprescription OR 'over the counter' OR 'over-the-counter' OR 'without a prescription' OR 'pharmacist-prescribed' OR 'pharmacy access' OR 'GP-prescribed' OR 'general practitioner prescribed' OR 'without prescription' OR 'community pharmacy services' OR 'pharmacy' OR 'pharmacist') AND AB, TI, KW (HIV)

**Clinicaltrials**

<https://clinicaltrials.gov/>

1/15/2021

"PrEP" AND "Pharmacy"

"PrEP" AND "over the counter"

"Pre-Exposure Prophylaxis" AND "over the counter"

"Pre-Exposure Prophylaxis" AND "pharmacy"

**WHO ICTRP**

<https://apps.who.int/trialsearch/>

1/15/2021

Pre exposure prophylaxis AND HIV

**PACTR**

<http://www.pactr.org/>

1/15/2021

pre exposure prophylaxis

PrEP

**ANZCTR**

<https://www.anzctr.org.au/>

1/15/2021

pre exposure prophylaxis

PrEP

**Cochrane Library**

<https://www.cochranelibrary.com/search>

1/15/2021

Pre exposure prophylaxis AND HIV

PrEP

PrEP AND Over-the-counter

PrEP AND Pharmacy

**AIDS, 2020**

[https://www.aids2020.org/wp-content/uploads/2020/09/AIDS2020\\_Abstracts.pdf](https://www.aids2020.org/wp-content/uploads/2020/09/AIDS2020_Abstracts.pdf)

1/15/2021

PrEP

Pharmacy

over the counter

otc

**AIDS, 2018**

[http://www.aids2018.org/Portals/4/File/AIDS2018\\_Abtract\\_book.pdf?ver=2018-08-06-160624-427](http://www.aids2018.org/Portals/4/File/AIDS2018_Abtract_book.pdf?ver=2018-08-06-160624-427)

1/15/2021

PrEP

Pharmacy

over the counter

otc

**AIDS, 2016**

[https://www.aids2016.org/Portals/0/File/AIDS2016\\_Abstracts\\_LOW.pdf?ver=2016-08-10-154247-087](https://www.aids2016.org/Portals/0/File/AIDS2016_Abstracts_LOW.pdf?ver=2016-08-10-154247-087)

1/15/2021

PrEP

Pharmacy

over the counter

otc

**IAS, 2019**

<http://programme.ias2019.org/Abstract>

1/19/2021

PrEP

Pharmacy

over the counter

otc

**IAS, 2017**

[http://www.ias2017.org/Portals/1/Files/IAS2017\\_LO.compressed.pdf?ver=2017-07-27-211231-197](http://www.ias2017.org/Portals/1/Files/IAS2017_LO.compressed.pdf?ver=2017-07-27-211231-197)

1/19/2021

PrEP

Pharmacy

over the counter

otc

**IAS, 2015**

<http://pag.ias2015.org/Abstract/Index>

1/19/2021

PrEP

Pharmacy

over the counter

otc

**CROI**

<https://www.croiconference.org/search-abstracts/>

1/19/2021

PrEP

Pharmacy

over the counter

otc

**HIVR4P, 2018**

<https://www.liebertpub.com/doi/full/10.1089/aid.2018.5000.abstracts>

1/19/2021

PrEP

Pharmacy

over the counter

otc

**HIVR4P, 2016**

<https://www.liebertpub.com/doi/full/10.1089/aid.2016.5000.abstracts>

1/19/2021

PrEP

Pharmacy  
over the counter  
otc
